## INDEX TO VOLUME L

- A**ccounts of Nineteenth-Century South America, by Bernard Naylor, noticed, 212-213.
- Actividades políticas y económicas de los jesuitas en el Río de la Plata. La era de los Habsburgos*, by Magnus Morner, noticed, 636.
- Adams, Richard N., review by, 558-560.
- After Kino: Jesuit Missions in North-western New Spain, 1711-1767*, by John Augustine Donohue, S.J., reviewed, 776.
- Aftosa: A Historical Survey of Foot-and-Mouth Disease and Inter-American Relations*, by Manuel A. Machado, Jr., reviewed, 567-568.
- Agassiz, Louis and Elizabeth, *A Journey in Brazil*, introduction by A. Curtis Wilgus, noticed, 424.
- Agricultura y la ganadería argentina en el período 1930-1960, La*, by José Alfredo Martínez de Hoz, reviewed, 193-195.
- Agricultural Development of Argentine, The. A Policy and Development Perspective*, by Darrell F. Fienup et al., forward by Lowell S. Hardin, reviewed, 812-813.
- Agricultural Development of Mexico, The. Its Structure and Growth Since 1950*, by Eduardo L. Venezian and William K. Gamble, forward by Lowell S. Hardin, reviewed, 376-378.
- Agricultural Development of Peru, The*, by Arthur J. Coutu and Richard A. King, forward by Lowell S. Hardin, reviewed, 395-397.
- Agricultural Development of Venezuela, The*, by Louis E. Heaton, forward by Lowell S. Hardin, reviewed, 796-797.
- Aguilar, Luis E., review by, 172-174.
- Alba, Víctor, *The Latin Americans*, noticed, 627.
- Alcina Franch, José (ed.), *Expediciones acerca de los antiguos monumentos de la Nueva España 1805-1808*, by Guillermo Dupaix, noticed, 634-635.
- Alden, Dauril, review by, 593-594.
- Alegría, Fernando, *La literatura chilena contemporánea*, noticed, 839-840.
- Alessandro, Joseph V., review by 827-828; notice by, 221-222.
- Alexander, Robert J., *The Communist Party of Venezuela*, reviewed, 799-800; *An Introduction to Argentina*, reviewed, 191-192.
- Alisky, Marvin, *Uruguay: A Contemporary Survey*, reviewed, 410-411; (ed.), *Who's Who in Mexican Government*, noticed, 838; notice by, 213.
- Alliance for Progress: A Social Invention in the Making*, by Harvey S. Perloff, reviewed, 570-572.
- Almanaque político y de comercio de la ciudad de Buenos Ayres para el año de 1826*, foreword by Enrique M. Barba, noticed, 640.
- Almohad Movement in North Africa in the Twelfth and Thirteenth Centuries, The*, by Roger Le Tourneau, noticed, 427.
- Althoff, Phillip, reviews by, 176-178, 382-383, 792-793.
- Amazônia para os Negros Americanos, A (As origens de uma controvérsia internacional)*, by Nícia Vilela Luz, preface by Sérgio Buarque de Holanda, reviewed, 413-414.
- American Negro Slavery, A Modern Reader*, edited by Allen Weinstein and Frank Otto Gatell, noticed, 426.
- Americas Look at Each Other, The. Essays on the Culture and Life of the Americas*, by José Agustín Balseiro, noticed, 425-426.
- Amérigo Vespucci. El enigma de la historia de América*, by Vicente D. Sierra, reviewed, 135-137.
- Ameringer, Charles D., review by, 796-797.
- Anguizola, Gustave A., review by, 815-817.
- Aníbal Pinto: Historia política de su gobierno*, by Cristián Zegers A., reviewed, 809-811.
- Ansel, Bernard D., "European Adventurer in Tierra del Fuego: Julio Popper," 89-110; review by, 813-815.

- Antioqueño Colonization in Western Colombia*, by James J. Parsons, noticed, 223.
- Architecture of Mexico, The: Yesterday and Today*, by Hans Beacham, intro. by Mathias Goeritz, reviewed, 599-600.
- Argentina*, by H. S. Ferns, reviewed, 402-403.
- Argentina: análisis y autoanálisis*, edited by H. Ernest Lewald, noticed, 840.
- Arms of the *Ypiranga*, The, by Michael C. Meyer, 543-556.
- Army and Politics in Argentina 1928-1945, The. Yrigoyen to Perón*, by Robert A. Potash, reviewed, 407-409.
- Arquitectura latinoamericana 1930/1970*, by Francisco Bullrich, noticed, 831.
- Arzobispo Carranza y su tiempo, El*, by José Ignacio Tellechea Idígoras, reviewed, 127-128.
- Aschmann, Homer, review by, 366-367.
- Astiz, Carlos A. (ed.), *Latin American International Politics: Ambitions, Capabilities, and the National Interest of Mexico, Brazil, and Argentina*, reviewed, 118-119; *Pressure Groups and Power Elites in Peruvian Politics*, reviewed, 613-614.
- Astuto, Philip Louis, *Eugenio Espejo (1747-1795): Reformador ecuatoriano de la ilustración*, intro. by Leopoldo Benites Vinueza, reviewed, 591-592.
- Atlantic Slave Trade, The*, by Philip D. Curtin, reviewed, 557-558.
- “Attempted Economic Reform and Innovation in Bolivia under Antonio José de Sucre, 1825-1828,” by William Lofstrom, 279-299.
- Aymaras de las islas del Titicaca, Los*, by Václav Šolc, reviewed, 804-806.
- B**achmura, Frank T., notice by, 629-630.
- Bader, Thomas A., review by, 148-149.
- Baer, Werner, *The Development of the Brazilian Steel Industry*, reviewed, 622-624.
- Bagú, Sergio and Humberto Gussoni, *El desarrollo cultural en la liberación de América Latina*, reviewed, 752-753.
- Bahía e a Carreira da Índia, A*, by José Roberto do Amaral Lapa, reviewed, 593-594.
- Baily, Francis, *Journal of a Tour in Unsettled Parts of North America in 1796 and 1797*, edited by Jack D. L. Holmes, foreword by John Francis McDermott, noticed, 634.
- Baily, Samuel L., reviews by, 193-195, 616-618.
- Baird, Joseph A., reviews by, 167-168, 599-600.
- Baker, Maury D., review by, 560-562.
- Baklanoff, Eric N. (ed.), *The Shaping of Modern Brazil*, by Manoel Cardozo, reviewed, 205-207; review by, 114-115.
- Balhana, Altiva Pilatti et al., Campos Gerais: Estruturas agrárias, reviewed, 208-210.
- Ball, M. Margaret, *The OAS in Transition*, reviewed, 568-570.
- Balseiro, Jose Agustin, *The Americas Look at Each Other. Essays on the Culture and Life of the Americas*, noticed, 425-426.
- Barager, Joseph R., review by, 404-405.
- Baranson, Jack, *Industrial Technologies for Developing Economies*, noticed, 630.
- Barbarous Mexico*, by John Kenneth Turner, intro. by Sinclair Snow, reviewed, 156-157.
- Bardi, Pietro Maria, *New Brazilian Art*, noticed, 841.
- Barrera, Mario, *Modernization and Coercion*, reviewed, 748-749.
- Bartlett, Ruhl J., review by, 568-570.
- Bartley, Russell H., “A Decade of Soviet Scholarship in Brazilian History: 1958-1968,” 445-466.
- Batalla de Boyacá—7 de agosto de 1819—a través de los archivos españoles, La*, ed. by Juan Friede, noticed, 836.
- Baumgardner, Marion, notice by, 211.
- Baur, John E., review by, 179-180.
- Bazant, Jan, *Historia de la deuda exterior de México (1823-1946)*, reviewed, 160-162.
- Beacham, Hans, *The Architecture of Mexico: Yesterday and Today*, reviewed, 599-600.
- Beals, Carleton, *Great Guerrilla Warriors*, noticed, 628-629.

- Beaulac, Willard L., *A Diplomat Looks at Aid to Latin America*, reviewed, 758-759.
- Beezley, William H., "State Reform during the Provisional Presidency: Chihuahua, 1911," 524-537.
- Benardete, M. J., and Ángel Flores (ed.), *Cervantes Across the Centuries*, noticed, 632.
- Bennett, Robert L., review by, 562-563.
- Berazaluze, Ana María and Federico Suárez (eds.), *Documentos del reinado de Fernando VII*. Vol. V: *Pedro Sainz de Andino. Escritos*, prepared by the Seminario de Historia Moderna, reviewed, 581-583.
- Berge, Dennis E., "A Mexican Dilemma: The Mexico City Ayuntamiento and the Question of Loyalty, 1846-1848," 229-256.
- Berghe, Pierre Van den and Benjamin N. Colby, *IXIL Country: A Plural Society in Highland Guatemala*, reviewed, 378-379.
- Bergman, Arlene Eisen and Magali Sarfatti Larson, *Social Stratification in Peru*, reviewed, 748-749.
- Berlandier, Jean Louis, *The Indians of Texas in 1830*, edited and intro. by John C. Ewers, reviewed, 152-153.
- Bernal, Ignacio, *The Olmec World*, reviewed, 121-122.
- Berthe, Jean-Pierre (ed.), *Le Mexique à la fin du XVII siècle vu par un voyageur italien*, by Gemelli Careri, noticed, 217.
- Betancourt, Rómulo, *La revolución democrática en Venezuela, 1959-1964*, reviewed, 388-389.
- Bibliografía histórica mexicana*, Vol. II: 1968, compiled by Susana Uribe de Fernández de Córdoba *et al.*, noticed, 216.
- Bibliografía histórica mexicana*, Vol. III: 1969, compiled by Susana Uribe de Fernández de Córdoba, noticed, 637.
- Bibliografía sobre suelos*, Vol. III, edited by Eduardo Ferreira Sobral, noticed, 211.
- Bibliographie de l'Espagnol d'Amérique*, by Jacques Lapointe, noticed, 424.
- Bibliography of Latin American Bibliographies*, A, compiled by Arthur E. Gropp, noticed, 829.
- Bibliography on Guillermo Prieto, Mexican Poet-Statesman*, by Malcolm D. McLean, noticed, 220.
- Bigg-Wither, Thomas P., *Pioneering in South Brazil. Three Years of Forest and Prairie Life in the Province of Paraná*, noticed, 435-436.
- Bishko, C. J., review by, 144-146.
- Bixler, Paul, *The Mexican Library*, reviewed, 168-169.
- Black Man in Red Cuba*, by John Clytus, with Jane Rieker, reviewed, 790-792.
- Blanco Moheno, Roberto, *Pancho Villa, que es su padre!* noticed, 221.
- Bobb, Bernard E., notice by, 633.
- Bolivian Revolution and U. S. Aid Since 1952*, *The*, by James W. Wilkie, reviewed, 806-807.
- Bonachea, Rolando E. and Nelso P. Valdés (eds.), *Che: Selected Works of Ernesto Guevara*, reviewed, 792-793.
- Borah, Woodrow, review by, 139-140, 557-558.
- Borderland Empires in Transition, The Triple-Nation Transfer of Florida*, by Robert L. Gold, reviewed, 140-142.
- Bourne, Richard, *Political Leaders of Latin America*, reviewed, 741-742.
- Boxer, C. R., *The Portuguese Seaborne Empire: 1415-1825*, reviewed, 767-769; notices by, 215-216, 833-834, 834.
- Brading, David A., "Mexican Silver-Mining in the Eighteenth Century: The Revival of Zacatecas," 665-681; notice by, 633-634.
- Brannon, Russell, H., review by, 376-378.
- Bravo Ugarte, José, *Instituciones políticas de la Nueva España*, noticed, 633.
- Brazilian Secondary Education and Socio-economic Development*, by Robert J. Havighurst and Aparecida J. Gouveia, reviewed, 827-828.
- Brazil's New Agrarian Reform. An Evaluation of its Property Classification and Tax System*, by Armin K. Ludwig and Harry W. Taylor, reviewed, 624-626.

- Breyman, Walter N., review by, 160-162.
- Brothers, Dwight S. *et al.*, *Estructura financiera y desarrollo económico*, reviewed, 162-164.
- Broussard, Ray, notice by, 200
- Brubaker, George A., reviews by, 183-184, 586-587.
- Bullrich, Francisco, *Arquitectura latino-americana 1930/1970*, noticed, 831; *New Directions in Latin American Architecture*, reviewed, 353-355.
- Burggraff, Winfield J., review by, 799-800; notice by, 434-435.
- Burnett, Ben G., review by, 800-802.
- Burns, E. Bradford, notice by, 430-431.
- Burrus, Ernest J., S.J., "Rivera y Moncada, Explorer and Military Commander of Both Californias, in the Light of His Diary and Other Contemporary Documents," 682-692; *et al.*, *Homenaje a Don José María de la Peña y Cámara*, reviewed, 766-767; *La obra cartográfica de la provincia mexicana de la Compañía de Jesús (1567-1967)*, reviewed, 366-367; reviews by, 129-131, 587-588; notice by, 216-217.
- Burt, Al and Barnard Diederich, *Papa Doc: The Truth about Haiti Today*, reviewed, 385-386.
- Bushnell, David, review by, 598-599; notice by, 219-220.
- Bushnell, G. H. S., *The First Americans: The Pre-Columbian Civilizations*, noticed, 214-215.
- Byam Davies, Claude Nigel, *Los señoríos independientes del imperio Azteca*, reviewed, 761-762.
- C**abrera de Nevaes' *Observations of the United States of North America in 1834*, edited by José de Onis, noticed, 213-214.
- Cademártori, José, *La economía chilena. Un enfoque marxista*, reviewed, 189-191.
- Cadenhead, I. E., Jr., review by, 758-759.
- Calcott, Lady Maria (Maria Dundas Graham), *Journal of a Residence in Chile, during the Year 1822. And a Voyage from Chile to Brazil in 1823*, introduction by A. Curtis Wilgus, noticed, 424; *Journal of a Voyage to Brazil, and Residence There, during Part of the Years 1821, 1822, 1823*, introduction by A. Curtis Wilgus, noticed, 424.
- California Coast, The. A Bilingual Edition of Documents from the Sutro Collection*, edited by Donlad C. Cutler, reviewed, 364-365.
- Calvert, Peter, *Latin America: Internal Conflict and International Peace*, reviewed, 565-566.
- Cambio económico y social en cuatro comunidades del Altiplano de Bolivia, El*, by Olen E. Leonard, reviewed, 804-806.
- Campos Gerais: Estruturas agrárias*, by Altiva Pilatti Balhana *et al.*, reviewed by, 208-210.
- Cancian, Frank, review by, 378-379.
- Cantarino, Vicente, review by, 575-576.
- Cantón, Darío, *Materiales para el estudio de la sociología política en la Argentina*, reviewed, 197-198.
- Capital Formation and Economic Development in Mexico*, by Joseph S. La Cascia, reviewed, 162-164.
- Capital y desarrollo: La Venezuela agraria*, Vol. I: *La etapa agraria*, by Domingo Alberto Rangel, reviewed, 795-796.
- Cárdenas, Gonzalo H., *Las luchas nacionales contra la dependencia*, reviewed, 813-815.
- Cardozo, Manoel *et al.*, *The Shaping of Modern Brazil*, edited by Eric N. Baklanoff, reviewed, 205-207.
- Careri, Gemelli, *Le Mexique à la fin du XVII siècle vu par un voyageur italien*, edited by Jean-Pierre Berthe, noticed, 217.
- "Carlos Pellegrini and the Financial Crisis of 1890," by John E. Hodge, 499-523.
- Carrasco, Pedro, review by, 603-604.
- Carter, William E., *Comunidades aymaras y reforma agraria en Bolivia*, reviewed, 804-806; *New Lands and Old Traditions: Kekchi Cultivators in the Guatemalan Lowlands*, reviewed, 606-607.
- "Carting in the Hispanic World: An Example of Divergent Development," by David R. Ringrose, 30-51.
- Carvalho-Neto, Paulo de, *History of*

- Iberoamerican Folklore. Mestizo Cultures*, reviewed, 352-353.
- Castanien, Donald G., *El Inca Garcilaso de la Vega*, reviewed, 146-147.
- Castedo, Leopoldo, *A History of Latin American Art and Architecture. From Pre-Columbian Times to the Present*, edited by Phyllis Freeman, reviewed, 353-355.
- Castro, Fidel, *History Will Absolve Me. The Moncada Trial Defense Speech. Santiago de Cuba. October 16, 1953*, reviewed, 172-174.
- Castro, the Kremlin, and Communism in Latin America, by D. Bruce Jackson, reviewed, 172-174.
- Central American Common Market, *The: Profits & Problems in an Integrating Economy*, noticed, 434.
- Century of Brazilian History Since 1865, *A. Issues and Problems*, edited by Richard Graham, noticed, 224.
- Cervantes Across the Centuries, edited by Angel Flores and M. J. Bernadete, noticed, 632.
- Céspedes, Guillermo; review by, 766-767.
- Chavarría, Jesús, "The Intellectuals and the Crisis of Modern Peruvian Nationalism: 1870-1919," 257-278.
- Chaves, Julio César, *Historia general del Paraguay*. Vol. I: *Descubrimiento y conquista del Río de la Plata y el Paraguay*, reviewed, 412.
- "Che" Guevara on Revolution. *A Documentary Overview*, edited by Jay Mallin, reviewed, 174-176.
- Che: *Selected Works of Ernesto Guevara*, edited by Rolando E. Bonachea and Nelson P. Valdés, reviewed, 792-793.
- Che: *The Making of a Legend*, by Martin Ebon, reviewed, 174-176.
- Chilcote, Ronald H., review by, 607-608.
- Chilean Christian Democracy: *Politics and Social Forces*, by James Petras, reviewed, 749.
- Ciclo de Vargas, O. Vol. VII: *1934: A Constituyente*, by Hélio Silva, reviewed, 416-418.
- Ciclo de Vargas, O. Vol. VIII: *1935: A revolta vermelha*, by Hélio Silva, reviewed, 824-825.
- Ciria, Alberto, *Partidos y poder en la Argentina moderna (1930-46)*, noticed, 840-841; and Horacio Sanguinetti, *Los Reformistas*, reviewed, 192-193.
- Cisneros Lugones, Antonio, *Manual de danzas regionales del folklore argentino*, noticed, 641.
- Cities in a Changing Latin America. *Two Studies of Urban Growth in the Development of Mexico and Venezuela*, by David J. Fox and D. J. Robinson, noticed, 631.
- Ciudad vieja de Montevideo, *La. Trazado inicial y evolución en su primer cuarto de siglo*, by Luis R. Ponce de León, noticed, 219-220.
- Civilian-Military Relations in Brazil, 1889-1898, by June E. Hahner, reviewed, 203-205.
- Cleaves, Peter S., *Developmental Processes in Chilean Local Government*, reviewed, 748-749.
- Clytus, John, *Black Man in Red Cuba*, with Jane Rieker, reviewed, 790-792.
- Cochiti Dam Archaeological Salvage Project, *The. Part 1: Report on the 1963 Season*, compiled by Charles H. Lange, noticed, 426-427.
- Cockcroft, James D. *Intellectual Precursors of the Mexican Revolution, 1900-1913*, reviewed, 372-374.
- Coe, Michael D., notice by, 214.
- Cohen, William B., notice by, 429-430.
- Cohen, J. M. (ed.), *The Four Voyages of Christopher Columbus*, reviewed, 769-770.
- Colao, Alberto, *Descripciones de Cartagena en el siglo XVI. Hurtado. Cascales. Cervantes*, reviewed, 360-361.
- Colby, Benjamin N. and Pierre Y. Van den Berghe, *Ixil Country: A Plural Society in Highland Guatemala*, reviewed, 378-379.
- Colmenares, G., *Encomienda y población en la provincia de Pamplona (1549-1650)*, reviewed, 144-146; et al., *Fuentes coloniales para la historia del trabajo en Colombia*, noticed, 835.
- Colombian Entrepreneur in Bogotá, *The*, by Aaron Lipman, reviewed, 390-391.
- Colonial Empires from the Eighteenth Century, *The*, by D. K. Fieldhouse, noticed, 429-430.
- Colonial Governors from the Fifteenth

- Century to the Present*, by David P. Henige, noticed, 834.
- Colonial Heritage of Latin America, The. Essays on Economic Dependence in Perspective*, by Stanley J. and Barbara H. Stein, reviewed, 583-584.
- Committee on Latin America, *The, Latin American Economic & Social Serials*, noticed, 212.
- Communication and Social Change in Latin America. Introducing New Technology*, by Paul J. Deutschmann et al., foreword by Eugene Jacobson, reviewed, 560-562.
- Communist Party of Venezuela, The*, by Robert J. Alexander, reviewed, 799-800.
- Complete Bolivian Diaries of Ché Guevara and Other Captured Documents, The*, edited by Daniel James, reviewed, 176-178.
- "Computer and the Colonial Treasury Accounts, The: A Proposal for a Methodology," by Paul E. Hoffman, 731-740.
- Comunidades aymaras y reforma agraria en Bolivia*, by William E. Carter, reviewed, 804-806.
- Conflict and Continuity in Brazilian Society*, edited by Henry H. Keith and S. F. Edwards, reviewed, 420-421.
- Conquista justificada, La. Los justos títulos de España en Indias*, by Guillermo Vázquez Franco, noticed, 429.
- Conrad, Robert, review by, 368-370; notice by, 224-225.
- Consejo Superior de Investigaciones Científicas. Instituto Jerónimo Zurita, *Cuadernos de Historia. Anexos de la revista HISPANIA*. Vol. I: *El tránsito de la Edad Media al Renacimiento en la historia de España*. Vol. II: *Relaciones hispano-francesas a través del tiempo*. Vol. III: *La sociedad castellana en la baja Edad Media*, reviewed, 578-580.
- Construtores do império, Os., Ideais e lutas do Partido Conservador Brasileiro*, by João Camillo de Oliveira Tôrres, reviewed, 202-203.
- Contrabando y el comercio exterior en la Nueva España, El*, introductions by Ernesto de la Torre Villar and Luis Chavez Orozco, noticed, 633-634.
- Contrarrevolución en la independencia, La. Los españoles en la vida política, social y económica de México (1804-1838)*, by Romeo Flores Caballero, reviewed, 778-780.
- Cooper, Donald B., review by, 412-413.
- Cooper, William F., reviews by, 120-121, 618.
- Corvalán, Octavio, notice by, 640-641.
- Costansó, Miquel, *The Costansó Narrative of the Portolá Expedition. First Chronicle of the Spanish Conquest of Alta California*, noticed, 835.
- Costansó Narrative of the Portolá Expedition, The. First Chronicle of the Spanish Conquest of Alta California*, by Miguel Costansó, intro. by Ray Brandes, noticed, 835.
- Coutu, Arthur J. and Richard A. King, *The Agricultural Development of Peru*, foreword by Lowell S. Hardin, reviewed, 395-397.
- Covington, James, notice by, 832-833.
- Crist, Raymond E., review by, 795-796.
- Crone, G. R., *The Discovery of America*, reviewed, 361-362.
- Crouthamel, James L., notice by, 435-436.
- Cruz, Manuel de la, *Episodios de la Revolución Cubana*, noticed, 838-839.
- Cuadernos de Historia. Anexos de la revista HISPANIA*. Vol. I: *El tránsito de la Edad Media al Renacimiento en la historia de España*. Vol. II: *Relaciones hispano-francesas a través del tiempo*. Vol. III: *La sociedad castellana en la baja Edad Media*, prepared by the Consejo Superior de Investigaciones Científicas. Instituto Jerónimo Zurita, reviewed, 578-580.
- Cuban Revolution of Fidel Castro viewed from Abroad, The. An Annotated Bibliography*, by Gilberto V. Fort, reviewed, 169-170.
- Cubans in Exile. Disaffection and the Revolution*, by Richard R. Fagen et al., reviewed, 178-179.
- Cultural Factors in Inter-American Relations*, edited by Samuel Shapiro, reviewed, 351-352.

- Culture Change and Shifting Populations in Central Northern Mexico*, by William B. Griffen, reviewed, 590-591.
- Cummins, L. Lejeune, review by, 570-572.
- Cuna Indian Art: The Culture and Craft of Panama's San Blas Islanders*, by Clyde E. Keeler, reviewed, 379-380.
- Cunningham, James S., review by, 198-200.
- Curtin, Philip D., *The Atlantic Slave Trade*, reviewed, 557-558.
- Cutter, Donald C., *The California Coast. A Bilingual Edition of Documents from the Sutro Collection*, reviewed, 364-365; review by, 777-778.
- D**ahl, Victor, notice by, 641-642.
- Dandler H., Jorge, *El sindicalismo campesino en Bolivia. Los cambios estructurales en Ucuireña*, reviewed, 804-806.
- Darwin's South America*, by Robert S. Hopkins, reviewed, 119-120.
- Datos básicos de población en América Latina, 1970*, noticed, 830.
- Davies, Archibald P., review by, 773-774.
- Davis, Harold E., notice by, 223-224.
- Dean, Warren, *The Industrialization of São Paulo, 1880-1945*, reviewed, 822-824.
- Death of a Revolutionary. Che Guevara's Last Mission*, by Richard Harris, reviewed, 792-793.
- "Decade of Soviet Scholarship in Brazilian History, A: 1958-1968," by Russell H. Bartley, 445-466.
- Demerson, Jorge, *La Real Sociedad Económica de Amigos del País, de Avila (1786-1857)*, reviewed, 132-133.
- Desarrollo cultural en la liberación de América Latina, El*, by Sergio Bagú and Humberto Gussoni, reviewed, 752-753.
- Descripciones de Cartagena en el siglo XVI. Hurtado. Cascales. Cervantes*, by Alberto Colao, reviewed, 360-361.
- "*Detached Recollections*" of General D. F. O'Leary, *The*, edited by R. A. Humphreys, noticed, 212-213.
- Deutschmann, Paul J. et al., *Communication and Social Change in Latin America. Introducing New Technology*, foreword by Eugene Jacobson, reviewed, 560-562.
- Development of the Brazilian Steel Industry, The*, by Werner Baer, reviewed, 622-624.
- Development of the Colombian Labor Movement, The*, by Miguel Urrutia, reviewed, 800-802.
- Developmental Processes in Chilean Local Government*, by Peter S. Cleaves, reviewed, 748-749.
- Dew, Edward, *Politics in the Altiplano: The Dynamics of Change in Rural Peru*, reviewed, 393-395.
- Diccionario bio-bibliográfico de la Compañía de Jesús en México. Vols. VII-IX: Siglo XVII (1600-1699)*, by Francisco Zambrano, notified, 216-217.
- Dictatorship and Development: The Methods of Control in Trujillo's Dominican Republic*, by Howard J. Warda, reviewed, 386-388.
- Diederich, Bernard and Al Burt, *Papa Doc: The Truth about Haiti Today*, reviewed, 385-386.
- Dierks, Jack Cameron, *A Leap to Arms: the Cuban Campaign of 1898*, noticed, 838.
- Diffie, Bailey W., review by, 767-769.
- Dilg, G. Robertson, notices by, 429, 435, 635-636, 642-643.
- Diplomat Looks at Aid to Latin America, A*, by Willard L. Beaulac, reviewed, 758-759.
- Discovery of America, The*, by G. R. Crane, reviewed, 361-362.
- Dissent in Three American Wars*, by Samuel Eliot Morison, Frederick Merk, and Frank Friedel, noticed, 631.
- Distribución del ingreso en un área urbana: el caso de Monterrey*, by Jesús Puente Leyva, introduction by Ifigenia M. de Navarrete, reviewed, 783-784.
- Dix, Robert H., reviews by, 181-183, 392-393.
- Dobyns, Henry F., reviews by, 590-591, 804-806.
- Documentos del reinado de Fernando VII. Vol. V: Pedro Sainz de Andino. Escritos*, prepared by the Seminario de Historia Moderna, edited by Fed-

- erico Suárez and Ana María Berazaluze, reviewed, 581-583.
- Documentos históricos de la Revolución Mexicana*. Vol. XV: *Revolución y régimen constitucionalista*, edited by Josefina E. de Fabela, reviewed, 780-781.
- Dolkart, Ronald H., review by, 407-409.
- Dominican Republic, The: Nation in Transition*, by Howard J. Wiarda, reviewed, 180-181.
- Donohue, John Augustine, S.J., *After Kino: Jesuit Missions in Northwestern New Spain, 1711-1776*, reviewed, 776.
- Dorn, Georgette Magassy, review by, 195-196.
- Dos Passos, John, *The Portugal Story. Three Centuries of Explorations and Discovery*, noticed, 215-216.
- Dotson, Floyd W., review by, 750-752.
- Dozier, Craig L., *Land Development and Colonization in Latin America: Case Studies of Peru, Bolivia, and Mexico*, reviewed, 395-397.
- Dulles, John W. F., review by, 420-421.
- Dunham, Katherine, *Island Possessed*, noticed, 639.
- Dupaix, Guillermo, *Expediciones acerca de los antiguos monumentos de la Nueva España 1805-1808*, edited by José Alcina Franch, noticed, 634-635.
- E**bel, Roland H., reviews by, 565-566, 745-747.
- Ebon, Martin, *Che: The Making of a Legend*, reviewed, 174-176.
- Economía chilena, La. Un enfoque marxista*, by José Cademártori, reviewed, 189-191.
- Economic Commission for Latin America of the United Nations, *Economic Survey of Latin America, 1966*, reviewed, 114-115.
- Economic History of Spain, An*, by Jaime Vicens Vives, with the collaboration of Jorge Nadal Oller, reviewed, 576-578.
- Economic Policy-Making and Development in Brazil, 1947-1964*, by Nathaniel H. Leff, reviewed, 418-420.
- Economic Survey of Latin America, 1966*, by the Economic Commission for Latin America of the United Nations, reviewed, 114-115.
- Economy of Brazil The*, edited by Howard S. Ellis, foreword by Lincoln Gordon, reviewed, 621-622.
- Economy of Paraguay, The*, by Joseph Pincus, reviewed, 198-200.
- Edel, Matthew, *Food Supply and Inflation in Latin America*, reviewed 747-748.
- Edmonson, Munro S., review by, 604-605.
- Educación en Centroamérica, La*, by Ovido Soto Blanco, noticed, 221-222.
- Education and Development in Latin America*, by Laurence Gale, reviewed, 563-565.
- Edwards, S. F. and Henry H. Keith (eds.), *Conflict and Continuity in Brazilian Society*, reviewed, 420-421.
- Eidt, Robert C., review by, 395-397.
- Ejército mexicano (1911-1965), El*, by Jorge Alberto Lozoya, reviewed, 781-783.
- El Inca Garcilaso de la Vega*, by Donald G. Castanien, reviewed, 146-147.
- Electric Power in Brazil: Entrepreneurship in the Public Sector*, by Judith Tendler, foreword by Albert O. Hirschmann, reviewed, 200-201.
- Ellis, Howard S. (ed.), *The Economy of Brazil*, foreword by Lincoln Gordon, reviewed, 621-622.
- Elasser, Edward O., review by, 192-193.
- “Emil Körner and the Prussianization of the Chilean Army: Origins, Process, and Consequences, 1885-1920,” by Frederick M. Nunn, 300-322.
- Encomienda y población en la provincia de Pamplona (1549-1650)*, by G. Colmenares, reviewed, 144-146.
- Engines of Change: United States Interests and Revolution in Latin America*, by George C. Lodge, introduction by Samuel P. Huntington, reviewed, 756-757.
- Engel, Theo and Lieselotte, *Twilight of Ancient Peru. The Glory and Decline of the Inca Empire*, noticed, 631-632.
- Ensayos sobre historia de América*, by Charles C. Griffin, noticed, 431-432.
- Episodios de la Revolución Cubana*, by Manuel de la Cruz, noticed, 838-839.

- Escritos del Libertador*. Vol. I: *Introducción general*. Vol. II: *Documentos particulares*, I. *Documentos particulares*, II. Vol. IV: *Documentos No. 1-287. 14 octubre 1795-5 agosto 1813*, edited by Cristóbal L. Mendoza et al., reviewed, 150-151.
- Estructura financiera y Desarrollo económico*, by Dwight S. Brothers et al., reviewed, 162-164.
- Estudio e índice general de El Plata Científico y Literario 1854-1855 y Atlántida 1911-1913*, by Néstor Tomás Auza, noticed, 223-224.
- Estudios de historia política dominicana*, by Pedro Troncoso Sánchez, reviewed, 179-180.
- Eugenio Espejo (1747-1795): Reformador ecuatoriano de la Ilustración*, by Philip Louis Astuto, intro. by Leopoldo Benites Vinuesa, reviewed, 591-592.
- "European Adventurer in Tierra del Fuego: Julio Popper," by Bernard D. Ansel, 89-110.
- Evanson, Philip, review by, 202-203.
- Eveleth, Phyllis B. (ed.), *The Negro in Brazilian Society*, by Florestan Fernandes, reviewed, 421-423.
- Ewers, John C. (ed.), *The Indians of Texas in 1830*, by Jean Louis Berlandier, reviewed, 152-153.
- Executives and Associates of Hill and Knowlton International, *Handbook on International Public Relations*, Vol. II, noticed, 426.
- Expediciones acerca de los antiguos monumentos de la Nueva España 1805-1808*, by Guillermo Dupaix, edited by José Alcina Franch, noticed, 634-635.
- Fabela, Josefina E. de (ed.), *Documentos históricos de la Revolución Mexicana*. Vol. XV: *Revolución y régimen constitucionalista*, reviewed 780-781.
- Fagen, Richard R. et al., *Cubans in Exile. Disaffection and the Revolution*, reviewed, 178-179; *The Transformation of Political Culture in Cuba*, reviewed, 609-610.
- Fagg, John Edwin, reviews by, 131-132, 576-578.
- Fahl, Gundolf, *Der Grundsatz der Freiheit der Meere in der Staatenpraxis von 1493 bis 1648. Eine rechtsgeschichtliche Untersuchung*, reviewed, 763-764.
- Fajardo M., Darío, *El régimen de la encomienda en la provincia de Vélez (Población indígena y economía)*, reviewed, 586-587.
- Falcoff, Mark, review by, 405-407.
- Fals Borda, Orlando, *Subversion and Social Change in Colombia*, reviewed, 391-392.
- Familia y cultura en Colombia*, by Virginia Gutiérrez de Pineda, reviewed, 183-184.
- Faraone, Roque, *El Uruguay en que vivimos (1900-1968)*, reviewed, 619-620.
- Farriss, N. M., review by, 588-589.
- Faulk, Odie B., *The Geronimo Campaign*, noticed, 433.
- Fehrenbach, Charles Wentz, "Moderados and Exaltados: The Liberal Opposition to Ferdinand VII, 1814-1823," 52-69.
- Felix, David, review by, 112-114.
- Fennell, Lee C., review by, 197-198.
- Fernandes, Florestan, *The Negro in Brazilian Society*, edited by Phyllis B. Eveleth, reviewed, 421-423.
- Fernández, Justino, *A Guide to Mexican Art. From Its Beginnings to the Present*, reviewed, 167-168.
- Ferns, H. S., *Argentina*, reviewed, 402-403.
- Ferreira Sobral, Eduardo (ed.), *Bibliografía sobre suelos*, Vol. VI, noticed, 211.
- Feuereisen, Fritz and Ernst Schmacke (eds.), *Die Presse in Lateinamerika*, noticed, 213.
- Fidalgos and Philanthropists. The Santa Casa de Misericórdia of Bahia, 1550-1755*, by A. J. R. Russell-Wood, reviewed, 370-372.
- Fidel Castro*, by Enrique Meneses, reviewed, 170-171.
- Fidel Castro*, by Herbert L. Matthews, reviewed, 172-174.
- Fieldhouse, D. K., *The Colonial Empires from the Eighteenth Century*, noticed, 429-430.
- Fienup, Darrell F. et al., *The Agricultural Development of Argentine. A Policy and Development Perspective*,

- foreword by Lowell S. Hardin, reviewed, 812-813.
- First Americans, The: The Pre-Columbian Civilizations*, by G. H. S. Bushnell, noticed, 214-215.
- First from the Gulf to the Pacific: The Diary of the Kino-Atondo Peninsular Expedition, December 14, 1684-January 13, 1685*, edited by W. Michael Mathes, reviewed, 365-366.
- Flammang, Robert A., review by, 742-743.
- Flickema, Thomas O., " 'Sam Ward's Bargain': A Tentative Reconsideration," 538-542.
- Flores, Ángel, and M. J. Bernardete (eds.), *Cervantes Across the Centuries*, noticed, 632.
- Flores Caballero, Romeo, *La contrarrevolución en la independencia. Los españoles en la vida política, social y económica de México (1804-1838)*, reviewed, 778-780.
- Florescano, Enrique, *Precios del maíz y crisis agrícolas en México (1708-1810). Ensayo sobre el movimiento de los precios y sus consecuencias económicas y sociales*, reviewed, 139-140.
- Floyd, Troy S., notice by, 636.
- Flux et reflux de la traite des nègres entre le Golfe de Bénin et Bahia de Todos os Santos du XVII<sup>e</sup>, au XIX<sup>e</sup> siècle*, by Pierre Verger, reviewed, 368-370.
- Foner, Philip S., reviews by, 169-170, 609-610, 791-792.
- Fonseca, Gondin da, *A Revolução Francesa e a vida de José Bonifácio: uma interpretação incômoda*, noticed, 431.
- Food Supply and Inflation in Latin America*, by Matthew Edel, reviewed, 747-748.
- Ford, Thomas, review by, 184-185.
- Foreign Relations of the United States. The Conferences at Washington, 1941-1942, and Casablanca, 1943*, noticed, 630-631.
- Foreign Relations of the United States. Diplomatic Papers. 1945. Vol. VI. The British Commonwealth; the Far East. Vol. VII. The Far East; China*, noticed, 630-631.
- Foreign Relations of the United States. Diplomatic Papers. 1945. Vol. IX: The American Republics*, reviewed, 355-357.
- Foreign Relations of the United States. Diplomatic Papers 1946. Vol. III: Paris Peace Conference: Proceedings. Vol. IV: Paris Peace Conference: Documents. Vol. V: The British Commonwealth; Western and Central Europe. Vol. VII: The Near East and Africa*, noticed, 831-832.
- Foreign Relations of the United States. Diplomatic Papers. 1946. Vol. XI: The American Republics*, reviewed, 755-756.
- Fort, Giberto V., *The Cuban Revolution of Fidel Castro Viewed from Abroad. An Annotated Bibliography*, reviewed, 169-170.
- Fortique, José Rafael, Vicente Salías, noticed, 640.
- Foster, George M., review by, 785-786.
- Four Voyages of Christopher Columbus, The*, edited by J. M. Cohen, reviewed, 769-770.
- Fox, David J., and D. J. Robinson, *Cities in a Changing Latin America. Two Studies of Urban Growth in the Development of Mexico and Venezuela*, noticed, 631.
- Fraboschi, Elena, notice by, 641.
- Francis, Michael J., review by, 756-757.
- Franciscan Missionaries in Hispanic California, 1769-1848. A Biographical Dictionary*, by Maynard Geiger, O. F. M., reviewed, 777-778.
- Frank, Andre Gunder, *Latin America: Underdevelopment or Revolution. Essays on the Development of Underdevelopment and the Immediate Enemy*, reviewed, 745-747.
- Frankman, Myron, reviews by, 164-165, 743-745.
- Freeman, Phyllis (ed.), *A History of Latin American Art and Architecture. From Pre-Columbian Times to the Present*, by Leopoldo Castedo, reviewed, 353-355.
- Friede, Juan (ed.), *La batalla de Boyacá —7 de agosto de 1819— a través de los archivos españoles*, noticed, 836.
- Friedel, Frank, Samuel Eliot Morison, and Frederick Merk, *Dissent in Three American Wars*, noticed, 631.
- Frontier Settlement in Mexican Cali-*

- ifornia. *The Hija-Padrés Colony, and Its Origins, 1769-1835*, by C. Alan Hutchinson, reviewed, 601-602.
- Fuentes coloniales para la historia del trabajo en Colombia*, ed. by G. Colmenares et al., noticed, 835.
- Fuson, Robert H., notice by, 427-428.
- Gale, Laurence, *Education and Development in Latin America*, reviewed, 563-565.
- Gamble, William K., and Eduardo L. Venezian, *The Agricultural Development Mexico. Its Structure and Growth Since 1950*, foreword by Lowell S. Hardin, reviewed, 376-378.
- Gamio, Manuel, *El inmigrante mexicano. La historia de su vida*, reviewed, 786-787.
- Gandía, Enrique de, *Historia de las ideas políticas en la Argentina*. Vol. IV: *Las ideas políticas de las primeras revoluciones y la supuesta conspiración de Alzaga*. Vol. V: *Las ideas políticas de la independencia americana*, reviewed, 404-405.
- García, Enriqueta et al., *Materiales para la arqueología de Teotihuacán*, edited by José L. Lorenzo, reviewed, 573-574.
- García Díaz, Tarsicio (ed.), *Resumen de la estadística del Imperio Mexicano. 1822*, by Simón Tadeo Ortiz de Ayala, noticed, 432-433.
- García Martínez, Bernardo, *El Marquesado del Valle. Tres siglos de régimen señorial en Nueva España*, reviewed, 362-364.
- García Peláez, Francisco de Paula (ed.), *Memorias para la historia del Antiguo Reyno de Guatemala*, Vol. I, noticed, 218-219.
- Gardiner, C. Harvey (ed.), *Journeys across the Pampas and among the Andes*, by Francis Bond Head, noticed, 435; *William Hickling Prescott. A Biography*, introduction by Allan Nevins, reviewed, 753-755.
- Garibaldi y el Uruguay, by Carlos M. Rama, noticed, 641-642.
- Gatell, Frank Otto, and Allen Weinstein, *American Negro Slavery, A Modern Reader*, noticed, 426.
- Geiger, Maynard, O.F.M., *Franciscan Missionaries in Hispanic California, 1769-1848. A Biographical Dictionary*, reviewed, 777-778.
- Gellman, Irwin, review by, 380-382.
- Génesis del modernismo*, 2nd ed., edited by Iván A. Schulman, reviewed, 120-121.
- "Genesis of the Rurales: Mexico's Early Struggle for Public Security," by Paul Vanderwood, 323-344.
- Geografía económica de México (siglo XVI)*, by Alejandra Moreno Toscano, reviewed, 137-139.
- Gerald, Rex. E., *Spanish Presidios of the Late Eighteenth Century in Northern New Spain*, noticed, 217-218.
- Gerassi, John (ed.), *Venceremos! The Speeches and Writings of Che Guevara*, reviewed, 176-178.
- "German Involvement in Northern Mexico, 1915-1916: A New Look at the Columbus Raid," by James A. Sandos, 70-88.
- Geronimo Campaign, The*, by Odie B. Faulk, noticed, 433.
- Gianello, Leoncio, *Historia del Congreso de Tucumán*, reviewed, 598-599.
- Gibson, Charles, reviews by, 362-364, 761-762.
- Giffin, Donald W., review by, 207-208.
- Gilderhus, Mark T., review by, 375-376.
- Glade, William P., *The Latin American Economies: A Study of their Institutional Evolution*, reviewed, 112-114.
- Glassman, Ronald M., *Political History of Latin America*, noticed, 628.
- Glauert, Earl T., notice by, 840.
- Glick, Thomas F., review by, 578-580.
- Gold, Robert L., *Borderland Empires in Transition. The Triple-Nation Transfer of Florida*, reviewed, 140-142; notice by, 217-218.
- Gómez Canedo, Lino (ed.), *Primeras exploraciones y poblamiento de Texas (1686-1694)*, reviewed, 142-143.
- Gómez-Quinones, Juan, notice by, 829-830.
- Góngora Marmolejo, Alonzo de, *Historia de Chile desde su descubrimiento hasta el año 1575*, reviewed, 773-774.
- González, Luis J., and Gustavo A. Sánchez Salazar, *The Great Rebel: Che Guevara in Bolivia*, reviewed, 174-176.

- González, Nancie L., *The Spanish-Americans of New Mexico. A Heritage of Pride*, reviewed, 602-603.
- Gonzalo Fernández de Oviedo y Valdés. *An Annotated Bibliography*, by Daymond Turner, noticed, 429.
- Gouveia, Aparecida J., and Robert J. Havighurst, *Brazilian Secondary Education and Socio-economic Development*, reviewed, 827-828.
- Graham, John, and C. A. Rodney, *The Reports on the Present State of the United Provinces of South America; Drawn Up by Messrs. Rodney and Graham, Commissioners Sent to Buenos Ayres by the Government of North America, and Laid before the Congress of the United States*, introduction by A. Curtis Wilgus, noticed, 424.
- Graham, Maria Dundas (Lady Maria Calcott), *Journal of a Residence in Chile, during the Year 1822. And a Voyage from Chile to Brazil in 1823*, introduction by A. Curtis Wilgus, noticed, 424; *Journal of a Voyage to Brazil, and Residence There, during Part of the Years 1821, 1822, 1823*, introduction by A. Curtis Wilgus, noticed, 424.
- Graham, Richard (ed.), *A Century of Brazilian History Since 1865. Issues and Problems*, noticed, 224; review by, 822-824.
- Gray, Richard B., review by, 180-181; notice by, 838.
- Gray, William H., notice by, 222-223.
- Great Guerrilla Warriors, by Carleton Beals, noticed, 628-629.
- Great Rebel, *The: Che Guevara in Bolivia*, by Luis J. González and Gustavo A. Sánchez Salazar, reviewed, 174-176.
- Greckel, Fay E., notice by, 630.
- Greenleaf, Richard E., *The Mexican Inquisition of the Sixteenth Century*, reviewed, 588-589; review by, 365-366.
- Grieb, Kenneth J., *The United States and Huerta*, reviewed, 375-376; notices by, 638, 836-837.
- Grieder, Terence, review by, 789-790; notice by, 841.
- Griffin, William B., *Culture Change and Shifting Populations in Central Northern Mexico*, reviewed, 590-591.
- Griffin, Charles C., *Ensayos sobre historia de América*, noticed, 431-432.
- Gropp, Arthur E. (comp.), *A Bibliography of Latin American Bibliographies*, noticed, 829.
- Grundsatz der Freiheit der Meere in der Staatenpraxis von 1493 bis 1648, *Der. Eine rechtsgeschichtliche Untersuchung*, by Gundolf Fahl, reviewed, 763-764.
- Guanaajuato: *An Analysis of Urban Form*, edited Jay Moor, reviewed, 783-784.
- Guerrillas in Latin America. *The Technique of the Counter-State*, by Luis Mercier Vega, reviewed, 384-385.
- Guía de Antigua Guatemala, by J. Joaquín Pardo et al., noticed, 218.
- Guía de fuentes para la historia de Ibero-América. *Escandinavia*, compiled by Magnus Mörner, noticed, 211-212.
- Guide to Mexican Art, *A. From Its Beginnings to the Present*, by Justino Fernández, reviewed, 167-168.
- Gunther, Erna, review by, 379-380.
- Gussoni, Humberto, and Sergio Bagú, *El desarrollo cultural en la liberación de América Latina*, reviewed, 752-753.
- Gutiérrez de Pineda, Virginia, *Familia y cultura en Colombia*, reviewed, 183-184.
- Guy, Donna, notices by, 213, 628, 640.
- H**acer la América. *Autobiografía de un inmigrante español en la Argentina*, by Juan F. Marsal, reviewed, 616-618.
- Hahner, June E., *Civilian-Military Relations in Brazil, 1889-1898*, reviewed, 203-205; review by, 620-621.
- Hale, Charles A., review by, 154-156.
- Hall, Thomas L., *Health Manpower in Peru. A Case Study in Planning*, reviewed, 184-185.
- Hamerly, Michael T., review by, 591-592.
- Hamill, Hugh M., Jr., review by, 594-596.
- Hamilton, Holman, review by, 765.
- Hammel, E. A., *Power in Ica: The*

- Structural History of a Peruvian Community*, reviewed, 397-399.
- Hammond, George P., review by, 143-144.
- Handbook on International Public Relations*. Vol. II, prepared by Executives and Associates of Hill and Knowlton International, noticed, 426.
- Hanke, Lewis, review by, 584-586.
- Hardoy, Jorge, *Urban Planning in Pre-Columbian America*, reviewed, 572-573.
- Hardy, B. Carmon, review by, 567-568; notice by, 220-221.
- Harman, Joyce Elizabeth, *Trade and Privatizing in Spanish Florida 1732-1763*, reviewed, 592-593.
- Harris, Richard, *Death of a Revolutionary. Che Guevara's Last Mission*, reviewed, 792-793.
- Harris, William Lane, *Las reclamaciones de la isla de Aves. Un estudio de las técnicas de las reclamaciones*, noticed, 222-223.
- Hauch, Charles C., review by, 563-565.
- Havighurst, Robert J., and Aparecida J. Gouveia, *Brazilian Secondary Education and Socio-economic Development*, reviewed, 827-828.
- Head, Francis Bond, *Journeys across the Pampas and among the Andes*, edited by C. Harvey Gardiner, noticed, 435.
- Health Manpower in Peru. A Case Study in Planning*, by Thomas L. Hall, reviewed, 184-185.
- Healy, David, notice by, 222.
- Heath, Dwight B., et al., *Land Reform and Social Revolution in Bolivia*, reviewed, 186-187.
- Heaton, Louis E., *The Agricultural Development of Venezuela*, foreword Lowell S. Hardin, reviewed, 796-797.
- Hedberg, Kathleen, notice by, 836.
- Hendrickson, Embert J., "Roosevelt's Second Venezuelan Controversy," 482-498.
- Henige, David P., *Colonial Governors from the Fifteenth Century to the Present*, noticed, 834.
- Herrera, Luis Alberto de, *La tierra charrua*, reviewed, 815-817.
- Hilton, Ronald (ed.), *The Movement Toward Latin American Unity*, reviewed, 742-743.
- Hinshaw, Robert, review by, 606-607.
- Historia de Chile desde su descubrimiento hasta el año 1575*, by Alonzo de Góngora Marmolejo, reviewed, 773-774.
- Historia de la Confederación Argentina*, by Adolfo Saldías, reviewed, 405-407.
- Historia de la deuda exterior de México (1823-1946)*, by Jan Bazant, reviewed, 160-162.
- Historia de la marina de Chile*, by Carlos López Urrutia, foreword by Guillermo Felú Cruz, reviewed, 811-812.
- Historia de las ideas políticas en la Argentina*. Vol. IV; *Las ideas políticas de la primeras revoluciones y la supuesta conspiración de Alzaga*. Vol. V: *Las ideas políticas de la independencia americana*, by Enrique de Gandía, reviewed, 404-405.
- Historia del Congreso de Tucumán*, by Leoncio Gianello, reviewed, 598-599.
- Historia del derecho español en América y del derecho indiano*, by José M. Ots y Capdequí, reviewed, 126-127.
- Historia del movimiento obrero boliviano. 1848-1900*, by Guillermo Lora, reviewed, 399-400.
- História do Supremo Tribunal Federal*. Vol. I: *1891-1898. Defesa das liberdades civis*. Vol. II: *1899-1910. Defesa do federalismo*, by Lêda Boechat Rodrigues, reviewed, 415-416.
- Historia e ideología de los Demócratas Christianos venezolanos*, by J. E. Rivera Oviedo, reviewed, 798-799.
- Historia general de el Reino de Chile, Flandes indiano*, by P. Diego de Rosales, reviewed, 773-774.
- Historia general del Paraguay*. Vol. I: *Descubrimiento y conquista del Río de la Plata y el Paraguay*, by Julio César Chaves, reviewed, 412.
- Historia social del gaucho*, by Ricardo Rodríguez Molas, reviewed, 195-196.
- Historia universal de las exploraciones*. Vol. IV; *Época contemporánea*, by Jules Rouch et al., edited by L. H. Parias, noticed, 428-429.
- Historia y pensamiento económico de México. Agricultura y ganadería. Propiedad de la tierra*, by Diego G. López Rosado, reviewed, 159-160.
- History of Iberoamerican Folklore*.

- Mestizo Cultures*, by Paulo de Carvalho-Neto, reviewed, 352-353.
- History of Latin American Art and Architecture, A. From Pre-Columbian Times to the Present*, by Leopoldo Castedo, edited by Phyllis Freeman, reviewed, 353-355.
- History of Mexican Mural Painting, A*, by Antonio Rodríguez, reviewed, 789-790.
- History Will Absolve Me. The Moncada Trial Defense Speech. Santiago de Cuba. October 16, 1953*, by Fidel Castro, reviewed, 172-174.
- Hodge, John E., "Carlos Pellegrini and the Financial Crisis of 1890," 499-523.
- Hoffman, Paul E., "The Computer and the Colonial Treasury Accounts: A Proposal for a Methodology," 731-740.
- Holanda, Sérgio Buarque de, *Visão do paraíso. Os motivos edênicos no descobrimento e colonização do Brasil*, noticed, 636-637.
- Holmes, Jack D. L. (ed.), *Journal of a Tour in Unsettled Parts of North America in 1796 and 1797*, by Francis Baily, foreword by John Francis McDermott, noticed, 634.
- Homenaje a Don José María de la Peña y Cámara*, by Ernest J. Burrus, S.J. et al., reviewed, 766-767.
- Hopkins, Robert S., *Darwin's South America*, reviewed, 119-120.
- Horowitz, Irving Louis (ed.), *Masses in Latin America*, reviewed, 750-752.
- Howe, Julia Ward, *A Trip to Cuba*, introduction by A. Curtis Wilgus, noticed, 424.
- Huck, Eugene R., and Edward H. Moseley (eds.), *Militarists, Merchants, and Missionaries. United States Expansion in Middle America*, reviewed, 566-567.
- Humphreys, R. A. (ed.), *The "Detached Recollections" of General D. F. O'Leary*, noticed, 212-213.
- Hurt, Wesley, notice by, 634-635.
- Hutchinson, C. Alan, "Wilfrid Hardy Callcott (1895-1969)," 349-350; *Frontier Settlement in Mexican California. The Hajar-Padres Colony, and Its Origins, 1769-1835*, reviewed, 601-602.
- Hutman, Norma Louise, *Machado: A Dialogue with Time. Nature as an Expression of Temporality in the Poetry of Antonio Machado*, noticed, 632-633.
- Illich, Ivan O., reviews by, 351-352, 759-761.
- Ilustración y reforma de la Iglesia. Pensamiento político-religioso de Don Gregorio Mayáns y Siscar (1699-1781)*, by Antonio Mestre, reviewed, 129-131.
- Imler, Anthony, notice by, 634.
- Immigration and Nationalism: Argentina and Chile, 1890-1914*, by Carl Solberg, reviewed, 614-616.
- In the Eyes of the Ancestors: Belief and Behavior in a Maya Community*, by June Nash, reviewed, 785-786.
- In the Fist of the Revolution. Life in a Cuban Country Town*, by José Yglesias, reviewed, 382-383.
- Indian Art and History: The Testimony of Prehispanic Rock Paintings in Baja California*, by Clement W. Meighan, noticed, 832-833.
- Indians of Texas in 1830, The*, by Jean Louis Berlandier, edited and intro. by John C. Ewers, reviewed, 152-153.
- Industrial Technologies for Developing Economies*, by Jack Baranson, noticed, 630.
- Industrialization of São Paulo, 1880-1945, The*, by Warren Dean, reviewed, 822-824.
- "Influence of Hipólito Unanue on Peruvian Medical Science, 1789-1830, The: A Reappraisal," by John E. Woodham, 693-714.
- Ingstad, Helge, *Westward to Vinland: The Discovery of Pre-Columbian Norse House-sites in North America*, noticed, 427-428.
- Immigrante mexicano, El. La historia de su vida*, by Manuel Gamio, reviewed, 786-787.
- Instituciones políticas de la Nueva España*, by José Bravo Ugarte, noticed 633.
- Instrucciones para el manejo de las haciendas jesuitas del Peru (ss. XVII-XVIII)*, by Pablo Macera, noticed, 635-636.
- Insurgent Mexico*, by John Reed, edited

- by Albert L. Michaels and James W. Wilkie, noticed, 638.
- Intellectual Precursors of the Mexican Revolution, 1880-1913*, by James D. Cockcroft, reviewed, 372-374.
- "Intellectuals and the Crisis of Modern Peruvian Nationalism, The: 1870-1919," by Jesús Chavarría, 257-278.
- Intervention in Latin America*, edited by C. Neale Ronning, noticed, 832.
- Introduction to Argentina, An*, by Robert J. Alexander, reviewed, 191-192.
- Invasión de los indios bárbaros al noreste de México en los años de 1840 y 1841, La*, edited by Isidro Vizcaya Canales, reviewed, 153-154.
- Iriarte, General Tomás de, *Memorias. El sitio de Montevideo: 1846*, reviewed, 818-820.
- Island Possessed*, by Katherine Dunham, noticed, 639.
- Ixil Country: A Plural Society in Highland Guatemala*, by Benjamin N. Colby and Pierre L. Van den Berghe, reviewed, 378-379.
- J**ackson, D. Bruce, *Castro, the Kremlin, and Communism in Latin America*, reviewed, 172-174.
- James, Daniel (ed.), *The Complete Bolivian Diaries of Ché Guevara and Other Captured Documents*, reviewed, 176-178.
- Jesus of the Spirits*, by Pedro McGregor, noticed, 642-643.
- Johnson, Charles W. (comp.), *México en el siglo XX. Una bibliografía social y política de publicaciones extranjeras, 1900-1969*, noticed, 637.
- Johnson, John J. et al. (comps.), *The Mexican-American: A Selected and Annotated Bibliography*, noticed, 638-639.
- Jones, Joseph R., notice by, 215.
- Jones, Margaret E. W., notice by, 632-633.
- Jones, Oakah L., Jr., review by, 142-143.
- Jones, William B., review by, 127-128.
- José Joaquín Arriaga: Diary of His Surveys of the Frontier, 1796*, edited by John W. Robinson, reviewed, 365-366.
- Journal of a Residence in Chile, during the Year 1822. And a Voyage from Chile to Brazil in 1823*, by Maria Dundas Graham (Lady Maria Calcott), introduction by A. Curtis Wilgus, noticed, 424-425.
- Journal of a Tour in Unsettled Parts of North America in 1796 and 1797*, by Francis Baily, edited by Jack D. L. Holmes, foreword by John Francis McDermott, noticed, 634.
- Journal of a Voyage to Brazil, and Residence There, during Part of the Years 1821, 1822, 1823*, by Maria Dundas Graham (Lady Maria Calcott), introduction by A. Curtis Wilgus, noticed, 424-425.
- Journey in Brazil, A*, by Louis and Elizabeth Agassiz, introduction by A. Curtis Wilgus, noticed, 424-425.
- Journeys across the Pampas and among the Andes*, by Francis Bond Head, edited by C. Harvey Gardiner, noticed, 435.
- Julián Besteiro*, by Andrés Saborit, prologue by Luis Jiménez de Asúa, reviewed, 134-135.
- K**agan, Richard, review by, 358-360.
- Kamen, Henry, *The War of Succession in Spain 1700-1715*, reviewed 580-581.
- Kantor, Harry, review by, 741-742.
- Keeler, Clyde E., *Cuna Indian Art: The Culture and Craft of Panama's San Blas Islanders*, reviewed, 379-380.
- Keith, Henry H., and S. F. Edwards (eds.), *Conflict and Continuity in Brazilian Society*, reviewed, 420-421; review by, 824-825.
- Kellar, James H., notice by, 426-427.
- Keller, Allan, *The Spanish-American War. A Compact History*, noticed, 426.
- Kennedy, John J., and Mario Zañartú, S.J. (eds.), *The Overall Development of Chile*, reviewed, 807-809.
- Kersten, Ludwig, *Las tribus indígenas del gran chaco hasta fines del siglo XVIII. Una contribución a la etnografía histórica de Sudamérica*, reviewed, 574-575.
- King, Richard A., and Arthur J. Coutu, *The Agricultural Development of Peru*, foreword by Lowell S. Hardin, reviewed, 395-397.
- Klarén, Peter F., review by, 611-613.

- Klein, Herbert S., *Parties and Political Change in Bolivia 1880-1952*, reviewed, 802-804; review by, 399-400.
- Knox, A. J. G., notice by, 838-839.
- Knudson, Jerry W., review by, 806-807.
- Kraus, Hans P., *Sir Francis Drake. A Pictorial Biography*, with an Historical Introduction by Lt. Commander David W. Waters and Richard Boulind, noticed, 833-834.
- Kraus, Michael, review by, 753-755.
- Kubler, George, notice by, 831.
- Kuethe, Allan J., "The Pacification Campaign on the Riohacha Frontier, 1772-1779," 467-481.
- L**
- La Cascia, Joseph S., *Capital Formation and Economic Development in Mexico*, reviewed, 162-164.
- La Raza: *The Mexican Americans*, by Stan Steiner, reviewed, 788-789.
- Lamb, Ursula, review by, 763-764.
- Land Development and Colonization in Latin America: Case Studies of Peru, Bolivia, and Mexico*, by Craig L. Dozier, reviewed, 395-397.
- Land Reform and Social Revolution in Bolivia*, by Dwight B. Heath et al., reviewed, 186-187.
- Landsberger, Henry A. (ed.), *Latin American Peasant Movements*, reviewed, 558-560.
- Lange, Charles H. (comp.), *The Cochiti Dam Archaeological Salvage Project. Part 1: Report on the 1963 Season*, noticed, 426.
- Langley, Lester D., notice by, 426.
- Lapa, José Roberto do Amaral, *A Bahia e a Carreira da Índia*, reviewed, 593-594.
- Lapointe, Jacques, *Bibliographie de l'Espagnol d'Amérique*, noticed, 424.
- Larson, Magali Sarfatti, and Arlene Eisen Bergman, *Social Stratification in Peru*, reviewed, 748-749.
- Latin America and the World*, by Leopoldo Zea, intro. by María del Carmen Millán, reviewed, 116-117.
- Latin America: Internal Conflict and International Peace*, by Peter Calvert, reviewed, 565-566.
- Latin America: Problems in Economic Development*, edited by Charles T. Nisbet, reviewed, 743-745.
- Latin America: The Hegemonic Crisis and the Military Coup*, by José Nun, reviewed, 748-749.
- Latin America: Underdevelopment or Revolution. Essays on the Development of Underdevelopment and the Immediate Enemy*, by Andre Gunder Frank, reviewed, 745-747.
- Latin American Economic & Social Serials*, edited by The Committee on Latin America, noticed, 212.
- Latin American Economies, The: A Study of their Institutional Evolution*, by William P. Glade, reviewed, 112-114.
- Latin American International Politics: Ambitions, Capabilities, and the National Interest of Mexico, Brazil, and Argentina*, edited by Carlos Alberto Astiz, reviewed, 118-119.
- Latin American Management: Development and Performance*, compiled by Robert R. Rehder, reviewed, 562-563.
- Latin American Peasant Movements*, edited by Henry A. Landsberger, reviewed, 558-560.
- Latin Americans, The*, by Victor Alba, noticed, 627.
- Le Tourneau, Roger, *The Almohad Movement in North Africa in the Twelfth and Thirteenth Centuries*, noticed, 427.
- Leap to Arms, A: the Cuban Campaign of 1898*, by Jack Cameron Dierks, noticed, 838.
- Leff, Nathaniel H., *Economic Policy Making and Development in Brazil, 1947-1964*, reviewed, 418-420.
- Legitimacy and Stability in Latin America: A Study of Chilean Political Culture*, by Francisco José Moreno, reviewed, 400-402.
- León-Portilla, Miguel, *Pre-Columbian Literature of Mexico*, reviewed, 123-124.
- Leonard, Olen E., *El cambio económico y social en cuatro comunidades del Altiplano de Bolivia*, reviewed, 804-806.
- Letts de Espil, Courtney, *Noticias confidenciales de Buenos Aires a U.S.A. (1869-1892)*, reviewed, 817-818.
- Levine, Robert M., review by, 416-418.
- Lewald, H. Ernest (ed.), *Argentina: análisis y autoanálisis*, noticed, 840.
- Liberators, The: A Study of Independen-*

- dence *Movements in Spanish America*, by Irene Nicholson, reviewed, 594-596.
- Lieuwen, Edwin, review by, 111-112.
- Lindley, Thomas, *Narrativa de uma viagem ao Brasil*, noticed, 430-431.
- Lipman, Aaron, *The Colombian Entrepreneur in Bogotá*, reviewed, 390-391.
- Lipp, Solomon, *Three Argentine Thinkers*, reviewed, 618.
- Lister, Robert H., reviews by, 121-122, 573-574.
- Literatura chilena contemporánea*, La, by Fernando Alegría, noticed, 839-840.
- Living Poor, The: A Peace Corps Chronicle*, by Moritz Thomsen, reviewed, 610-611.
- Lockhart, James, review by, 146-147.
- Lockhart, Washington, *La vida cotidiana en la Colonia*. Vol. I: *Los pueblos*, reviewed, 148-149.
- Lodge, George C., *Engines of Change: United States Interests and Revolution in Latin America*, introduction by Samuel P. Huntington, reviewed, 756-757.
- Lofstrom, William, "Attempted Economic Reform and Innovation in Bolivia under Antonio José de Sucre, 1825-1828," 279-299.
- Logan, Rayford W., review by, 386-388.
- Lombardi, John V., *The Political Ideology of Fray Servando Teresa de Mier, Propagandist for Independence*, reviewed, 151-152; review by, 150-151; notices by, 223, 424, 429, 631, 640, 836, 839.
- López Rosado, Diego G., *Historia y pensamiento económico de México. Agricultura y ganadería. Propiedad de la tierra*, reviewed, 159-160.
- López, Urrutia, Carlos, *Historia de la marina de Chile*, foreword by Guillermo Feliú Cruz, reviewed, 811-812.
- Lora, Guillermo, *Historia del movimiento obrero boliviano, 1848-1900*, reviewed, 399-400.
- Lorenzo, José L. (ed.), *Materiales para la arqueología de Teotihuacán*, by Enriqueta García et al., reviewed, 573-574.
- Lozoya, Jorge Alberto, *El ejército mexicano (1911-1965)*, reviewed, 781-783.
- Luchas nacionales contra la dependencia*, Las, by Gonzalo H. Cárdenas, reviewed, 813-815.
- Ludwig, Armin K., and Harry W. Taylor, *Brazil's New Agrarian Reform. An Evaluation of its Property Classification and Tax System*, reviewed, 624-626.
- Lux, William R., review by, 752-753.
- Luz, Nícia Vilela, *A Amazônia para os Negros Americanos (As origens de uma controvérsia internacional)*, preface by Sérgio Buarque de Holanda, reviewed, 413-414.
- Lynch, John, *Spain under the Habsburgs*. Vol. II: *Spain and America 1598-1700*, reviewed, 358-360.
- Lynch, Thomas F., notice by, 631-632.
- Macaulay, Neill, *A Rebel in Cuba: An American's Memoir*, reviewed, 791-792; reviews by, 174-176, 384-385; notice by, 628-629.
- McCann, Frank D., review by, 205-207.
- McCoy, Terry L., reviews by, 189-191, 807-809.
- McDonald, Ronald H., review by, 400-402.
- McGann, Thomas F., notice by, 425-426.
- McGreevey, William P., review by, 391-392.
- McGregor, Pedro, *Jesus of the Spirits*, noticed, 642-643.
- McLean, Malcolm D., *Bibliography on Guillermo Prieto, Mexican Poet-Statesman*, noticed, 220.
- MacLeod, Murdo J., review by, 802-804; notices by, 218, 218-219.
- Macera, Pablo, *Instrucciones para el manejo de las haciendas jesuitas del Peru (ss. XVII-XVIII)*, noticed, 635-636.
- Machado: A Dialogue with Time. Nature as an Expression of Temporality in the Poetry of Antonio Machado*, by Norma Louise Hutman, noticed, 632-633.
- Machado, Manuel A., Jr., *Aftosa: A Historical Survey of Foot-and-Mouth Disease and Inter-American Relations*, reviewed, 567-568.
- Madsen, William, review by, 788-789.
- Magellan's Voyage: A Narrative Account of the First Circumnavigation*,

- by Antonio Pigafetta, edited by R. A. Skelton, reviewed, 770-772.
- “Magistracy and Society in Colonial Brazil,” by Stuart B. Schwartz, 715-730.
- Maldonado-Denis, Manuel, *Puerto Rico, una interpretación historico-social*, reviewed, 793-795.
- Mallin, Jay. (ed.), “Che” Guevara on Revolution. *A Documentary Overview*, reviewed, 174-176.
- Manchester, Alan K., review by, 203-205.
- Manual de darnas regionales del folklore argentino*, by Antonio Cisneros Lugones, noticed, 641.
- Manuel y José Azueta: Padre e hijo. Héroes en la gesta de 1914*, by Leonardo Pasquel, noticed, 836-837.
- Marett, Sir Robert, *Peru*, reviewed, 611-613.
- Mark Jefferson: Geographer*, by Geoffrey J. Martin, noticed, 213.
- Marquesado del Valle, El. Tres siglos de régimen señorial en Nueva España*, by Bernardo García Martínez, reviewed, 362-364.
- Marsal, Juan F., *Hacer la América. Autobiografía de un inmigrante español en la Argentina*, reviewed, 616-618.
- Martin, Bradford G., notice by, 427.
- Martin, Geoffrey J., *Mark Jefferson: Geographer*, noticed, 213.
- Martínez de Hoz, José Alfredo, *La agricultura y la ganadería argentina en el período 1930-1960*, reviewed, 193-195.
- Martz, John D., reviews by, 388-389, 798-799.
- Marx, Robert F., *The Treasure Fleets of the Spanish Main*, noticed, 219.
- Masses in Latin America*, edited by Irving Louis Horowitz, reviewed, 750-752.
- Masur, Gerhard, review by, 596-598.
- Materiales para la arqueología de Teotihuacán*, by Enriqueta García et al., edited by José L. Lorenzo, reviewed, 573-574.
- Materiales para el estudio de la sociología política en la Argentina*, by Darío Cantón, reviewed, 197-198.
- Mathes, W. Michael (ed.), *First from the Gulf to the Pacific: The Diary of the Kino-Atondo Peninsular Expedition, December 14, 1684-January 13, 1685*, reviewed, 365-366.
- Matthews, Herbert L., *Fidel Castro*, reviewed, 172-174.
- Meaker, Gerald H., review by, 134-135.
- Meighan, Clement W., *Indian Art and History: The Testimony of Prehispanic Rock Paintings in Baja California*, noticed, 832-833.
- Memórias*, by Marechal Mascarenhas de Moraes, intro. by General Meira Mattos, reviewed, 620-621.
- Memórias de un mambí*, by Manuel Piedra Martel, noticed, 222.
- Memórias, El sitio de Montevideo: 1846*, by General Tomás de Iriarte, reviewed, 818-820.
- Memórias para la historia del Antiguo Reyno de Guatemala*, Vol. I, edited by Francisco de Paula García Peláez, noticed, 218-219.
- Mendoza, Cristóbal L. (ed.), *Escritos del Libertador*. Vol. I: *Introducción general*. Vol. II: *Documentos particulares, I. Documentos particulares, II*. Vol. IV: *Documentos No. 1-287. 14 octubre 1795-5 agosto 1813*, reviewed, 150-151.
- Meneses, Enrique, *Fidel Castro*, reviewed, 170-171.
- Mercier Vega, Luis, *Guerrillas in Latin America. The Technique of the Counter-State*, reviewed, 384-385; *Roads to Power in Latin America*, reviewed, 111-112.
- Merk, Frederick, Frank Friedel, and Samuel Eliot Morison, *Dissent in Three American Wars*, noticed, 631.
- Mestre, Antonio, *Ilustración y reforma de la Iglesia. Pensamiento político-religioso de Don Gregorio Mayáns y Siscar (1699-1781)*, reviewed, 129-131.
- Mexican-American, The: A Selected and Annotated Bibliography*, compiled by John J. Johnson et al., noticed, 638-639.
- “Mexican Dilemma, A: The Mexico City Ayuntamiento and the Question of Loyalty, 1846-1848,” by Dennis E. Berge, 229-256.
- Mexican Inquisition of the Sixteenth Century, The*, by Richard E. Greenleaf, reviewed, 588-589.

- Mexican Library, The*, by Paul Bixler, reviewed, 168-169.
- "Mexican Silver-Mining in the Eighteenth Century: The Revival of Zacatecas," by David A. Brading, 665-681.
- México en el siglo XX. Una bibliografía social y política de publicaciones extranjeras, 1900-1969*, compiled by Charles W. Johnson, noticed, 637.
- México visto en el siglo XX. Entrevistas de historia oral*, by James W. Wilkie and Edna Monzón de Wilkie, noticed, 837.
- Mexique à la fin du XVII siècle vu par un voyageur italien, Le*, by Gemelli Careri, edited by Jean-Pierre Berthe, noticed, 217.
- Meyer, Michael C., "The Arms of the Ypiranga," 543-556; reviews by, 157-159, 780-781; notices by, 221, 433-434.
- Michaels, Albert L., and James W. Wilkie (eds.), *Insurgent Mexico*, by John Reed, noticed, 638; and James W. Wilkie (eds.), *Revolution in Mexico: Years of Upheaval, 1910-1940*, noticed, 433-434.
- Migraciones internas en América Latina*, by Jether Pereira Ramalho et al., reviewed, 115-116.
- Militarists, Merchants, and Missionaries. United States Expansion in Middle America*, edited by Eugene R. Huck and Edward H. Moseley, reviewed, 566-567.
- Millennial Kingdom of the Franciscans in the New World, The*, by John Leddy Phelan, noticed, 834-835.
- Miller, Elmer L., review by, 574-575.
- Miller, Robert Ryal, review by, 119-120.
- Millon, Robert P., *Zapata: The Ideology of a Peasant Revolutionary*, reviewed, 157-159.
- Mining and Petroleum Legislation in Latin America*, noticed, 831.
- Minnich, R. Herbert, review by, 208-210.
- Mirambell, Lorena E., *Técnicas lapidarias prehispánicas*, noticed, 214.
- Models of Political Change in Latin America*, edited by Paul E. Sigmund, noticed, 830-831.
- "Moderados and Exaltados: The Liberal Opposition to Ferdinand VII, 1814-1823," by Charles Wentz Fehrenbach, 52-69.
- Modernization and Coercion*, by Mario Barrera, reviewed, 748-749.
- Mörner, Magnus, *Actividades políticas y económicas de los jesuitas en el Río de la Plata. La era de los Habsburgos*, noticed, 636; (comp.), *Guía de fuentes para la historia de Ibero-América. Escandinavia*, noticed, 211-212; review by, 126-127.
- Monzón de Wilkie, Edna, and James W. Wilkie, *México visto en el siglo XX. Entrevistas de historia oral*, noticed, 837.
- Moor, Jay (ed.), *Guanajuato: An Analysis of Urban Form*, reviewed, 783-784.
- Moraes, Marechal Mascarenhas de, *Memórias*, intro. by General Meira Mattos, reviewed, 620-621.
- Morelos. Priest, Soldier, Statesman of Mexico*, by Wilbert H. Timmons, noticed, 836.
- Moreno, Francisco José, *Legitimacy and Stability in Latin America: A Study of Chilean Political Culture*, reviewed, 400-402.
- Moreno Toscano, Alejandro, *Geografía económica de México (siglo XVI)*, reviewed, 137-139.
- Morison, Samuel Eliot, Frederick Merk, and Frank Friedel, *Dissent in Three American Wars*, noticed, 631.
- Morley, Samuel A., review by, 418-420.
- Moseley, Edward H. and Eugene R. Huck (eds.), *Militarists, Merchants, and Missionaries. United States Expansion in Middle America*, reviewed, 566-567.
- Movement Toward Latin American Unity, The*, edited by Ronald Hilton, reviewed, 742-743.
- Munro, Dana G., reviews by, 116-117, 385-386.
- Murdock, Richard K., review by, 619-620.
- Music in Aztec & Inca Territory*, by Robert Stevenson, reviewed, 357-358.
- Nance, Joseph Milton, review by, 153-154.
- Narrativa de uma viagem ao Brasil*, by Thomas Lindley, noticed, 430-431.

- Nash, June, *In the Eyes of the Ancestors: Belief and Behavior in a Maya Community*, reviewed, 785-786.
- National Maritime Museum Catalogue of the Library. Vol. II: *Biography*, noticed, 833.
- Nava, Julian, notice by, 640.
- Naylor, Bernard, *Accounts of Nineteenth-Century South America*, noticed, 212-213.
- Naylor, Robert A., review by, 583-584.
- Needler, Martin C. (ed.), *Political Systems of Latin America*, noticed, 627-628.
- Negro in Brazilian Society, The*, by Florestan Fernandes, edited by Phyllis B. Eveleth, reviewed, 421-423.
- Nevins, Lawrence, review by, 413-414; notice by, 431.
- New Brazilian Art*, by Pietro Maria Bardi, noticed, 841.
- New Directions in Latin American Architecture*, by Francisco Bullrich, reviewed, 353-355.
- New Lands and Old Traditions: Kekchi Cultivators in the Guatemalan Lowlands*, by William E. Carter, reviewed, 606-607.
- Newton, Norman, *Thomas Gage in Spanish America*, reviewed, 774-776.
- Newton, Ronald C., "On 'Functional Groups,' 'Fragmentation,' and 'Pluralism' in Spanish American Political Society," 1-29.
- Nicholson, Irene, *The Liberators: A Study of Independence Movements in Spanish America*, reviewed, 594-596.
- Nisbet, Charles T. (ed.), *Latin America: Problems in Economic Development*, reviewed, 743-745.
- Norton, F. J., and Edward M. Wilson (eds.), *Two Spanish Verse Chap-Books. Romance de Amadís (c.1515-19). Juyzio Hallado y Trobado (c.1510:). A Facsimile Edition with Bibliographical and Textual Studies*, noticed, 215.
- Notes on Central America; Particularly the States of Honduras and San Salvador: Their Geography, Topography, Climate, Population, Resources, Productions, etc., and the Proposed Honduras Inter-oceanic Railway*, by Ephraim G. Squier, introduction by A. Curtis Wilgus, noticed, 424-425.
- Notes on Mexico, Made in the Autumn of 1822. Accompanied by an Historical Sketch of the Revolution, and Translations of Official Reports on the Present State of That Country*, by Joel Robert Poinsett, introduction by A. Curtis Wilgus, noticed, 424-425.
- Noticias confidenciales de Buenos Aires a U. S. A. (1869-1892)*, by Courtney Letts de Espil, reviewed, 817-818.
- Nun, Jose, *Latin America: The Hegemonic Crisis and the Military Coup*, reviewed, 748-749.
- Nunn, Frederick M., "Emil Körner and the Prussianization of the Chilean Army: Origins, Process, and Consequences, 1885-1920," 300-322; review by, 811-812.
- Nutini, Hugo G., *San Bernardino Contla. Marriage and Family Structure in a Tlaxcalan Municipio*, reviewed, 165-167.
- O***AS in Transition, The.*, by M. Margaret Ball, reviewed, 568-570.
- Obra cartográfica de la provincia Mexicana de la Compañía de Jesús (1567-1967), La*, by Ernest J. Burrus, S.J., reviewed, 366-367.
- Obra de Pedro Grases, La*, by Arturo Uslar Pietri *et al.*, noticed, 640.
- Ogelsby, J. C. M., review by, 580-581; notice by, 219.
- Olmec World, The*, by Ignacio Bernal, reviewed, 121-122.
- "On 'Functional Groups,' 'Fragmentation,' and 'Pluralism' in Spanish American Political Society," by Ronald C. Newton, 1-29.
- Onís, José de (ed.), *Cabrera de Nieves' Observations of the United States of North America in 1834*, noticed, 213-214.
- Ordeal in Mexico. Tales of Danger and Hardship Collected from Mormon Colonists*, retold by Karl E. Young, noticed, 220-221.
- Orígenes del Presidente Gómez*, by Luís Eduardo Pacheco, noticed, 434-435.
- Orrego-Salas, Juan A., review by, 357-358.
- Ortiz de Ayala, Simón Tadeo, *Resumen de la estadística del Imperio Mexi-*

- cano. 1822, edited by Tarsicio García Díaz, noticed, 432-433.
- Ortiz Marín, J., review by, 793-795.
- Ots y Capdequí, José M., *Historia del derecho español en América y del derecho indiano*, reviewed, 126-127.
- Overall Development of Chile, The*, edited by Mario Zanartú, S.J., and John J. Kennedy, reviewed, 807-809.
- P**acheco, Luis Eduardo, *Orígenes del Presidente Gómez*, noticed, 434-435.
- "Pacification Campaign on the Riohacha Frontier, 1772-1779, The," by Allan J. Keuthe, 467-481.
- Padden, Robert C., review by, 123-124.
- Pancho Villa, que es su padre!* by Roberto Blanco Moheno, noticed, 221.
- Papa Doc: The Truth about Haiti Today*, by Bernard Diederich and Al Burt, reviewed, 385-386.
- Pardo, J. Joaquín et al., *Guía de Antigua Guatemala*, noticed, 218.
- Parias, L. H. (ed.), *Historia universal de las exploraciones*, Vol. IV: *Época contemporánea*, by Jules Rouch et al., noticed, 428-429.
- Parry, J. H., review by, 147-148.
- Parsons, James J., *Antioqueno Colonization in Western Colombia*, noticed, 223.
- Partidos y poder en la Argentina moderna (1930-46)*, by Alberto Ciria, noticed, 840-841.
- Parties and Political Change in Bolivia 1880-1952*, by Herbert S. Klein, reviewed, 802-804.
- Partners in Development: Report of the Commission on International Development*, by Lester B. Pearson et al., noticed, 629-630.
- Paso de las Flores. Vida de seis familias en el Uruguay rural*, by Sonia Sosa et al., reviewed, 619-620.
- Pasquel, Leonardo, *Manuel y José Azueta: Padre e hijo. Héroes en la gesta de 1914*, noticed, 836-837.
- Payne, Stanley G., *The Spanish Revolution*, reviewed, 765.
- Pearson, Lester B. et al., *Partners in Development: Report of the Commission on International Development*, noticed, 629-630.
- Peñalosa, Fernando, reviews by, 602-603, 786-787; noticed by, 638-639.
- Peñalosa, Joaquín Antonio, *La practica religiosa en Mexico. Siglo XVI. Asedios de sociología religiosa*, reviewed, 587-588.
- Pennington, Campbell W., *The Tepehuan of Chihuahua. Their Material Culture*, reviewed, 603-604.
- Pennington, Loren E., review by, 769-770.
- Peraza, Fermín (ed.), *Revolutionary Cuba: A Bibliographical Guide, 1967*, noticed, 838.
- Pereira Ramalho, Jether et al. *Migraciones internas en América Latina*, reviewed, 115-116.
- Perloff, Harvey S. *Alliance for Progress: A Social Invention in the Making*, reviewed, 570-572.
- Peru*, by Sir Robert Marett, reviewed, 611-613.
- Pesquisa histórica no Brasil, A*, by Jose Honório Rodrigues, reviewed, 820-821.
- Peterson, Harold F., reviews by, 355-357, 817-818.
- Petión y Bolívar. Cuarenta años (1790-1830) de relaciones haitiano-venezolanas y su aporte a la emancipación de Hispanoamérica*, by Paul Verna, reviewed, 596-598.
- Petras, James, *Chilean Christian Democracy: Politics and Social Forces*, reviewed, 749; *Politics and Social Forces in Chilean Development*, reviewed, 187-189.
- Phelan, John Leddy, *The Millennial Kingdom of the Franciscans in the New World*, noticed, 834-835; notice by, 217.
- Piedra Martel, Manuel, *Memórias de un Mambi*, noticed, 222.
- Pigafetta, Antonio, *Magellan's Voyage: A Narrative Account of the First Circumnavigation*, edited by R. A. Skelton, reviewed, 770-772; *The Voyage of Magellan: The Journal of Antonio Pigafetta*, introduction by Howard H. Peckham, reviewed, 770-772.
- Pike, Fredrick B., review by, 613-614.
- Pike, Ruth, review by, 360-361.
- Pincus, Joseph, *The Economy of Paraguay*, reviewed, 198-200.
- Pioneering in South Brazil. Three Years of Forest and Prairie Life in the*

- Province of Paraná*, by Thomas P. Bigg-Wither, noticed, 435-436.
- Pletcher, David M., review by, 566-567; notices by, 211-212, 212, 212-213, 424-425, 426, 434, 627, 627-628, 630-631, 631, 830, 831, 831-832, 832, 833, 838, 838.
- Poinsett, Joel Robert, *Notes on Mexico, made in the Autumn of 1822. Accompanied by an Historical Sketch of the Revolution, and Translations of Official Reports on the Present State of That Country*, introduction by A. Curtis Wilgus, noticed, 424.
- Political Evolution of the Mexican People, The*, by Justo Sierra, intro. by Edmundo O'Gorman, reviewed, 154-156.
- Political History of Latin America*, by Ronald M. Glassman, noticed, 628.
- Political Ideology of Fray Servando Teresa de Mier, Propagandist for Independence, The*, by John V. Lombardi, reviewed, 151-152.
- Political Leaders of Latin America*, by Richard Bourne, reviewed, 741-742.
- Political Systems of Latin America*, edited by Martin C. Needler, noticed, 627-628.
- Politics and Social Forces in Chilean Development*, by James Petras, reviewed, 187-189.
- Politics in the Altiplano: The Dynamics of Change in Rural Peru*, by Edward Dew, reviewed, 393-395.
- Politics of Brazilian Development, 1930-1954, The*, by John D. Wirth, reviewed, 825-827.
- Ponce de León, Luis R., *La ciudad vieja de Montevideo. Trazado inicial y evolución en su primer cuarto de siglo*, noticed, 219-220.
- Portugal Story, The. Three Centuries of Exploration and Discovery*, by John Dos Passos, noticed, 215-216.
- Portuguese Seaborne Empire, The: 1415-1825*, by C. R. Boxer, reviewed, 767-769.
- Potash, Robert A., *The Army and Politics in Argentina 1928-1945. Yrigoyen to Peron*, reviewed, 407-409.
- Power in Ica: The Structural History of a Peruvian Community*, by E. A. Hammel, reviewed, 397-399.
- Practica religiosa en México, La. Siglo XVI. Asedios de sociologia religiosas*, by Joaquín Antonio Penalosa, reviewed, 587-588.
- Precios del maíz y crisis agrícolas en México (1708-1810). Ensayo sobre el movimiento de los precios y sus consecuencias económicas y sociales*, by Enrique Florescano, reviewed, 139-140.
- Pre-Columbian Art of Mexico and Central America*, by Hasso von Winning and Alfred Stendahl, reviewed, 124-125.
- Pre-Columbian Literature of Mexico*, by Miguel León-Portilla, reviewed, 123-124.
- Presse in Lateinamerika, Die*, edited by Fritz Feureisen and Ernst Schmacke, noticed, 213.
- Pressure Groups and Power Elites in Peruvian Politics*, by Carlos A. Astiz, reviewed, 613-614.
- Primeras exploraciones y problemamiento de Texas (1686-1694)*, edited by Lino Gómez Canedo, reviewed, 142-143.
- Primitiva literatura gauchesca, La*, by Jorge B. Rivera, noticed, 640-641.
- Puente Leyva, Jesús, *Distribución del ingreso en un area urbana: el caso de Monterrey*, introduction by Ifigenia M. de Navarrete, reviewed, 783-784.
- Puerto Rico, una interpretación histórico-social*, by Manuel Maldonado-Denis, reviewed, 793-795.
- Quintas, Amaro, *O sentido social da revolução praieira*, reviewed, 412-413.
- Quilter, Daniel, notice by, 632.
- Quirk, Robert E., notices by, 214-215, 216, 637, 637, 829, 830-831, 837.
- Rama, Carlos M., *Garibaldi y el Uruguay*, noticed, 641-642.
- Ramirez, Ezekiel Stanley, *As relações entre a Áustria e o Brasil, 1815-1889*, reviewed, 207-208.
- Ramssett, David E., *Regional Industrial Development in Central America. A Case Study of the Integration Industries Scheme*, reviewed, 607-608.
- Rangel, Domingo Alberto, *Capital y desarrollo: La Venezuela agraria. Vol. I: La estapa agraria*, reviewed, 795-796.
- Real Sociedad Económica de Amigos*

- del País, de Avila (1786-1857), La*, by Jorge Demerson, reviewed, 132-133.
- Rebel in Cuba, A. An American's Memoir*, by Neill Macauley, reviewed, 791-792.
- Reclamaciones de la isla de Aves, Las. Un estudio de las tecnicas de las reclamaciones*, by William Lane Harris, noticed, 222-223.
- Recruitment of Candidates in Mendoza Province, Argentina, The*, by Richard Robert Strout, reviewed, 409-410.
- Reed, John, *Insurgent Mexico*, edited by Albert L. Michaels and James W. Wilkie, noticed, 638.
- Reformistas, Los*, by Alberto Ciria and Horacio Sanguinetti, reviewed, 192-193.
- Régimen de la encomienda en la provincia de Vélez (Población indígena y economía), El*, by Darío Fajardo M., reviewed, 586-587.
- Regional Industrial Development in Central America. A Case Study of the Integration Industries Scheme*, by David E. Ramsett, reviewed, 607-608.
- Rehder, Robert R. (comp.), *Latin American Management: Development and Performance*, reviewed, 562-563.
- Reindorp, Reginald C., *Spanish American Customs, Culture and Personality*, noticed, 829-830.
- Relações entre a Austria e o Brasil, 1815-1889, As*, by Ezekiel Stanley Ramirez, reviewed, 207-208.
- Renshaw, Parke, review by, 421-423.
- Reports on the Present State of the United Provinces of South America, The; Drawn Up by Messrs. Rodney and Graham, Commissioners Sent to Buenos Ayres by the Government of North America, and Laid before the Congress of the United States*, by C. A. Rodney and John Graham, introduction by A. Curtis Wilgus, noticed, 424-425.
- Resnick, Enoch, notice by, 431-432.
- Resumen de la estadística del Imperio Mexicano. 1822*, by Simón Tadeo Ortiz de Ayala, edited by Tarsicio García Díaz, noticed, 432-433.
- Revolução Francesa e a vida de José Bonifácio, A: uma interpretação in-cômoda*, by Gondin de Fonseca, noticed, 431.
- Revolución democrática en Venezuela, 1959-1964, La*, by Romulo Betancourt, reviewed, 388-389.
- Revolution in Mexico: Years of Upheaval, 1910-1940*, edited by James W. Wilkie and Albert L. Michaels, noticed, 433-434.
- Revolutionary Cuba: A Bibliographical Guide, 1967*, ed. by Fermín Peraza, noticed, 838.
- Revolutionary Writings*, by Camilo Torres, reviewed, 392-393.
- Reynolds, Clark W., review by, 159-160.
- Ringrose, David R., "Carting in the Hispanic World: An Example of Divergent Development," 30-51.
- Rivera, Jorge B., *La primitiva literatura gauchesca*, noticed, 640-641.
- Rivera Oviedo, J. E., *Historia e ideología de los Demócratas Christianos venezolanos*, reviewed, 798-799.
- "Rivera y Moncada, Explorer and Military Commander of Both Californias, in the Light of His Diary and Other Contemporary Documents," by Ernest J. Burrus, S.J., 682-692.
- Roads to Power in Latin America*, by Luis Mexcier Vega, reviewed, 111-112.
- Robinson Crusoe's Island. A History of the Juan Fernández Islands*, by Ralph Lee Woodward, reviewed, 147-148.
- Robinson, D. J., and David J. Fox, *Cities in a Changing Latin America. Two Studies of Urban Growth in the Development of Mexico and Venezuela*, noticed, 631.
- Robinson, John W. (ed.), *José Joaquín Arrillaga: Diary of His Surveys of the Frontier, 1796*, reviewed, 365-366.
- Robock, Stefan H., reviews by, 200-201, 621-622.
- Rockefeller, Nelson A., *The Rockefeller Report on the Americas. The Official Report of a United States Presidential Mission for the Western Hemisphere*, introduction by Tad Szulc, reviewed, 759-761.
- Rockefeller Report on the Americas, The. The Official Report of a United States Presidential Mission for the*

- Western Hemisphere*, by Nelson A. Rockefeller, introduction by Tad Szule, reviewed, 759-761.
- Rodney, C. A., and John Graham, *The Reports on the Present State of the United Provinces of South America; Drawn Up by Messrs. Rodney and Graham, Commissioners Sent to Buenos Ayres by the Government of North America, And Laid before the Congress of the United States*, introduction by A. Curtis Wilgus, noticed, 424.
- Rodrigues, José Honório, *A pesquisa histórica no Brasil*, reviewed, 820-821.
- Rodrigues, Lêda Boechat, *História do Supremo Tribunal Federal*. Vol. I: 1891-1898. *Defesa das liberdades civis*. Vol. II: 1899-1910. *Defesa do federalismo*, reviewed, 415-416.
- Rodríguez, Antonio, *A History of Mexican Mural Painting*, reviewed, 789-790.
- Rodríguez Molas, Ricardo, *Historia social del gaucho*, reviewed, 195-196.
- Rodríguez O., Jaime E., review by, 778-780.
- Roett, Riordan, review by, 825-827.
- Rogers, Edward J., review by, 622-624.
- Ronning, C. Neale (ed.), *Intervention in Latin America*, noticed, 832.
- "Roosevelt's Second Venezuelan Controversy," by Embert J. Hendrickson, 482-498.
- Rosales, P. Diego de, *Historia general de el Reino de Chile, Flandes indiano*, reviewed, 773-774.
- Rosenn, Keith, review by, 415-416.
- Ross, Stanley R., "Frank Tannenbaum (1893-1969)," 345-348.
- Roth, Cecil (ed.), *The World History of the Jewish People*. Second Series: *Medieval Period*. Vol. II: *The Dark Ages, Jews in Christian Europe, 711-1096*, reviewed, 575-576.
- Rouch, Jules et al., *Historia universal de las exploraciones*. Vol. IV: *Época contemporánea*, edited by L. H. Parias, noticed, 428-429.
- Rowe, John Howland, review by, 572-573.
- Russell-Wood, A. J. R., *Fidalgos and Philanthropists. The Santa Casa da Misericórdia of Bahia, 1550-1755*, reviewed, 370-372.
- Russland und Lateinamerika, 1741-1841*. by Ekkehard Völkl, reviewed, 143-144.
- Saborit, Andrés, *Julián Besteiro*, prologue by Luis Jiménez de Asúa, reviewed, 134-135.
- Saint-Lu, André, *La Vera Paz. Esprit évangélique et colonisation*, reviewed, 584-586.
- Saldías, Adolfo, *Historia de la Confederación Argentina*, reviewed, 405-407.
- Salmon, Russell, notice by, 839-840.
- "'Sam Ward's Bargain': A Tentative Reconsideration," by Thomas O. Flickema, 538-542.
- San Bernardino Contla. Marriage and Family Structure in a Tlaxcalan Municipio*, by Hugo G. Nutini, reviewed, 165-167.
- Sánchez Salazar, Gustavo A., and Luis J. González, *The Great Rebel: Che Guevara in Bolivia*, reviewed, 174-176.
- Sandos, James A., "German Involvement in Northern Mexico, 1915-1916: A New Look at the Columbus Raid," 70-88.
- Sanguinetti, Horacio, and Alberto Ciria, *Los Reformistas*, reviewed, 192-193.
- Schmacke, Ernst, and Fritz Feuereisen (eds.), *Die Presse in Lateinamerika*, noticed, 213.
- Schmitt, Karl M., review by, 118-119.
- Scholes, Walter V., review by, 755-756.
- Schulman, Iván A. (ed.), *Génesis del modernismo*, reviewed, 120-121.
- Schulte, Henry F., *The Spanish Press, 1470-1966. Print, Power, and Politics*, reviewed, 131-132.
- Schwartz, Stuart B., "Magistracy and Society in Colonial Brazil," 715-730; reviews by, 370-372, 820-821.
- Scobie, James R., reviews by, 191-192, 812-813; notice by, 840-841.
- Scott, John F., reviews by, 124-125, 353-355.
- Scott, Robert E., reviews by, 187-189, 393-395, 397-399, 748-749; notice by, 627.
- Seale, William, review by 592-593.
- Select Bibliography, A: Asia, Africa,*

- Eastern Europe, Latin America. Supplement, 1969*, noticed, 627.
- Seminario de Historia Moderna, *Documentos del reinado de Fernando VII*. Vol. V: *Pedro Sainz de Andino. Escritos*, edited by Federico Suárez and Ana María Berazaluce, reviewed, 581-583.
- Senior, Clarence, reviews by, 115-116, 624-626.
- Señoríos independientes del imperio azteca, Los*, by Claude Nigel Byam Davies, reviewed, 761-762.
- Sentido social da revolução praieira, O*, by Amaro Quintas, reviewed, 412-413.
- Shaping of Modern Brazil*, by Manoel Cardozo et al., edited by Eric N. Baklanoff, reviewed, 205-207.
- Shapiro, Samuel (ed.), *Cultural Factors in Inter-American Relations*, reviewed, 351-352; review by, 178-179.
- Sheehan, John B., review by, 390-391.
- Shiels, W. Eugene, S.J., review by, 776.
- Sierra, Justo, *The Political Evolution of the Mexican People*, intro. by Edmundo O'Gorman, reviewed, 154-156.
- Sierra, Vicente D., *Amérigo Vespucci. El enigma de la historia de América*, reviewed, 135-137.
- Sigmund, Paul E. (ed.), *Models of Political Change in Latin America*, noticed, 830-831.
- Silva, Hélio, *O ciclo de Vargas*. Vol. VII: *1934: a constituinte*, reviewed, 416-418; Vol. VIII: *1935: A revolta vermelha*, reviewed, 824-825.
- Silvert, Kalman H. (ed.), *The Social Reality of Scientific Myth. Science and Social Change*, reviewed, 200-201.
- Simmons, Merle E., review by, 352-353.
- Sindicalismo campesino en Bolivia, El. Los cambios estructurales en Ucu-reña*, by Jorge Dandler H., reviewed, 804-806.
- Sir Frances Drake. *A Pictorial Biography*, by Hans P. Kraus, with an Historical Introduction by Lt. Commander David W. Waters and Richard Boulind, noticed, 833-834.
- Skelton, R. A. (ed.), *Magellan's Voyage: A Narrative Account of the First Circumnavigation*, by Antonio Pigafetta, reviewed, 770-772.
- Skidmore, Thomas E., notice by, 636-637.
- Smith, Gordon, review by, 747-748.
- Snow, Peter G., review by, 409-410.
- "Social Climbers: Changing Patterns of Mobility among the Indians of Colonial Peru," by Karen Spalding, 645-664.
- Social Reality of Scientific Myth, The. Science and Social Change*, edited by Kalman H. Silvert, reviewed, 200-201.
- Social Stratification in Peru*, by Magali Sarfatti Larson and Arlene Eisen Bergman, reviewed, 748-749.
- Solberg, Carl, *Immigration and Nationalism: Argentina and Chile, 1890-1914*, reviewed, 614-616.
- Sole, Václav, *Los aymaras de las islas del Titiaca*, reviewed, 804-806.
- Sosa, Sonia et al., *Paso de las Flores. Vida de seis familias en el Uruguay rural*, reviewed, 619-620.
- Sosin, Jack M., review by, 140-142.
- Soto Blanco, Ovido, *La educación en Centroamérica*, noticed, 221-222.
- Spain under the Habsburgs*. Vol. II: *Spain and America 1598-1700*, by John Lynch, reviewed, 358-360.
- Spalding, Hobart, Jr., review by, 402-403.
- Spalding, Karen, "Social Climbers: Changing Patterns of Mobility among the Indians of Colonial Peru," 645-664.
- Spanish American Customs, Culture and Personality*, by Reginald C. Rein-dorp, noticed, 829-830.
- Spanish-American War, The. A Compact History*, by Allan Keller, noticed, 426.
- Spanish-Americans of New Mexico, The. A Heritage of Pride*, by Nancie L. González, reviewed, 602-603.
- Spanish Presidios of the Late Eighteenth Century in Northern New Spain*, by Rex. E. Gerald, noticed, 217-218.
- Spanish Press, 1470-1966, The. Print, Power, and Politics*, by Henry F. Schulte, reviewed, 131-132.
- Spanish Revolution, The*, by Stanley G. Payne, reviewed, 765.
- Spence, Mary Lee, review by, 152-153.
- Squier, Ephraim G., *Notes on Central*

- America; Particularly the States of Honduras and San Salvador: Their Geography, Topography, Climate, Population, Resources, Productions, etc., and the Proposed Honduras Inter-oceanic Railway*, introduction by A. Curtis Wilgus, noticed, 424.
- "State Reform during the Provisional Presidency: Chihuahua, 1911," by William H. Beezley, 524-537.
- Stein, Barbara H. and Stanley J., *The Colonial Heritage of Latin America. Essays on Economic Dependence in Perspective*, reviewed, 583-584.
- Stein, Stanley J. and Barbara H., *The Colonial Heritage of Latin America. Essays on Economic Dependence in Perspective*, reviewed, 583-584.
- Steiner, Stan, *La Raza: The Mexican Americans*, reviewed, 788-789.
- Stendahl, Alfred, and Hasso von Winning, *Pre-Columbian Art of Mexico and Central America*, reviewed, 124-125.
- Stevenson, Robert, *Music in Aztec & Inca Territory*, reviewed, 357-358.
- Stokes, Charles J., *Transportation and Economic Development in Latin America*, reviewed, 560-562.
- Strassman, W. Paul, *Technological Change and Economic Development. The Manufacturing Experience of Mexico and Puerto Rico*, reviewed, 164-165.
- Strout, Richard Robert, *The Recruitment of Candidates in Mendoza Province, Argentina*, reviewed, 409-410.
- Suárez, Andrés, review by, 170-171.
- Suárez, Federico, and Ana María Berazaluce (eds.), *Documentos del reinado de Fernando VII. Vol. V: Pedro Sainz de Andino. Escritos*, prepared by the Seminario de Historia Moderna, reviewed, 581-583.
- Subversion and Social Change in Colombia*, by Orlando Fals Bonda, reviewed, 391-392.
- Suchlicki, Jaime, *University Students and Revolution in Cuba, 1920-1963*, reviewed, 380-382.
- Sutherland, Elizabeth, *The Youngest Revolution: A Personal Report on Cuba*, reviewed, 382-383.
- Svee, William R., review by, 614-616.
- "Tannenbaum, Frank (1893-1969)," obituary of, by Stanley R. Ross, 345-348.
- Tanner, Helen H., notice by, 639.
- Tapia, Francisco X., reviews by, 132-133, 581-583.
- Tarr, Terence S., review by, 809-811.
- Taylor, Harry W., and Armin K. Ludwig, *Brazil's New Agrarian Reform. An Evaluation of its Property Classification and Tax System*, reviewed, 624-626.
- Technological Change and Economic Development. The Manufacturing Experience of Mexico and Puerto Rico* by W. Paul Strassman, reviewed, 164-165.
- Técnicas lapidarias prehispánicas*, by Lorena E. Mirambell, noticed, 214.
- Tellechea Idígoras, José Ignacio, *El Anzobispo Carranza y su tiempo*, reviewed, 127-128.
- Tendencias de la participación electoral en Colombia*, by Anita Weiss, reviewed, 181-183.
- Tendler, Judith, *Electric Power in Brazil: Entrepreneurship in the Public Sector*, foreword by Albert O. Hirschmann, reviewed, 200-201.
- Tepahuan of Chihuahua, The. Their Material Culture*, by Campbell W. Pennington, reviewed, 603-604.
- Thomas Gage in Spanish America*, by Norman Newton, reviewed, 774-776.
- Thomsen, Moritz, *The Living Poor: A Peace Corps Chronicle*, reviewed, 610-611.
- Three Argentine Thinkers*, by Solomon Lipp, reviewed, 618.
- Tierra charrua, La*, by Luis Alberto de Herrera, reviewed, 815-817.
- Timmons, Wilbert H., *Morelos. Priest-Soldier, Statesman of Mexico*, noticed, 836; review by, 151-152; notice by, 432-433.
- Tjarks, Germán O. E., review by, 412.
- Tomás Auza, Néstor, *Estudio e índice general de El Plata Científico y Literario 1854-1855 y Atlántida 1911-1913*, noticed, 223-224.
- Torodash, Martin, reviews by, 135-137, 361-362, 770-772; notice by, 428-429.
- Torres, Camilo, *Revolutionary Writings*, reviewed, 392-393.
- Tórrres, João Camillo de Oliveira, *Os*

- construtores do império. Ideais e lutas do Partido Conservador Brasileiro*, reviewed, 202-203.
- Tovar, Ramón A., *Venezuela, país subdesarrollado*, noticed, 839.
- Trade and Privatizing in Spanish Florida 1732-1763*, by Joyce Elizabeth Harmon, reviewed, 592-593.
- Transformation of Political Culture in Cuba, The*, by Richard R. Fagen, reviewed, 609-610.
- Transportation and Economic Development in Latin America*, by Charles J. Stokes, reviewed, 560-562.
- Treasure Fleets of the Spanish Main, The*, by Robert F. Marx, noticed, 219.
- Tribus indígenas del gran chaco hasta fines del siglo XVIII, Las. Una contribución e la etnografía histórica de Sudamérica*, by Ludwig Kersten, reviewed, 574-575.
- Trip to Cuba, A*, by Julia Ward Howe, introduction by A. Curtis Wilgus, noticed, 424-425.
- Troncoso Sánchez, Pedro, *Estudios de historia política dominicana*, reviewed, 179-180.
- Turner, Daymond, *Gonzalo Fernández de Oviedo y Valdés. An Annotated Bibliography*, noticed, 429.
- Turner, John Kenneth, *Barbarous Mexico*, intro. by Sinclair Snow, reviewed, 156-157.
- Twilight of Ancient Peru. The Glory and Decline of the Inca Empire*, by Lieselotte and Theo Engl, noticed, 631-632.
- Two Spanish Verse Chap-Books. Romance de Amadís (c. 1515-19). Juyzio Hallado y Trobado (c. 1510). A Facsimile Edition with Bibliographical and Textual Studies*, by F. J. Norton and Edward M. Wilson, noticed, 215.
- United States and Huerta, The*, by Kenneth J. Grieb, reviewed, 375-376.
- United States versus Mexico, The: The Final Settlement of the Pious Fund*, by Francis J. Weber, foreword by Earl Warren, noticed, 434.
- University Students and Revolution in Cuba, 1920-1968*, by Jaime Suchlicki, reviewed, 380-382.
- Urban Planning in Pre-Columbian America*, by Jorge Hardoy, reviewed, 572-573.
- Uribe de Fernández de Córdoba, Susana et al. (comp.), *Bibliografía histórica mexicana*. Vol. II: 1968, noticed, 216; Vol. III: 1969, noticed, 637.
- Urrutia, Miguel, *The Development of the Colombian Labor Movement*, reviewed, 800-802.
- Uruguay: A Contemporary Survey*, by Marvin Alisky, reviewed, 410-411.
- Uruguay en que vivimos (1900-1968)*, El, by Roque Faraone, reviewed, 619-620.
- Uslar Pietri, Arturo et al., *La obra de Pedro Grases*, noticed, 640.
- Utley, Robert M., notice by, 433.
- Valdés, Nelson P., and Rolando E. Bonachea (eds.), *Che: Selected Works of Ernesto Guevara*, reviewed, 792-793.
- Vanderwood, Paul, "Genesis of the Rurales: Mexico's Early Struggle for Public Security," 323-344; reviews by, 156-157, 781-783.
- Vanger, Milton I., review by, 818-820.
- Vázquez Franco, Guillermo, *La conquista justificada. Los justos títulos de España en Indias*, noticed, 429.
- Venceremos! The Speeches and Writings of Che Guevara*, edited by John Gerassi, reviewed, 176-178.
- Venezian, Eduardo L., and William K. Gamble, *The Agricultural Development of Mexico. Its Structure and Growth Since 1950*, foreword by Lowell S. Hardin, reviewed, 376-378.
- Venezuela, país subdesarrollado*, by Ramón A. Tovar, noticed, 839.
- Vera Paz, La. *Esprit évangélique et colonisation*, by André Saint-Lu, reviewed, 584-586.
- Verger, Pierre, *Flux et reflux de la traite des nègres entre le Golfe de Bénin et Bahia de Todos os Santos du XVII<sup>e</sup> au XIX<sup>e</sup> siècle*, reviewed, 368-370.
- Verna, Paul, *Petión y Bolívar. Cuarenta años (1790-1830) de relaciones haitiano-venezolanas y su aporte a la emancipación de Hispanoamérica*, reviewed, 596-598.
- Vicens Vives, Jaime, *An Economic History of Spain*, with the collaboration

- of Jorge Nadal Oller, reviewed, 576-578.
- Vicente Salías*, by José-Rafael Fortique, noticed, 640.
- Vida cotidiana en la Colonia, La*. Vol. I: *Los pueblos*, by Washington Lockhart, reviewed, 148-149.
- Visão do paraíso. *Os motivos edênicos no descobrimento e colonização do Brasil*, by Sérgio Buarque de Holanda, noticed, 636-637.
- Vizcaya Canales, Isidro (ed.), *La invasión de los indios bárbaros al noreste de México en los años 1840 y 1841*, reviewed, 153-154.
- Vökl, Ekkehard, *Russland und Lateinamerika, 1741-1841*, reviewed, 143-144.
- Vogt, Evon Z., *Zinacantan: A Maya Community in the Highlands of Chiapas*, reviewed, 604-605.
- Von Winning, Hasso and Alfred Standahl, *Pre-Columbian Art of Mexico and Central America*, reviewed, 124-125.
- Voyage of Magellan, The: The Journal of Antonio Pigafetta*, by Antonio Pigafetta, introduction by Howard H. Peckham, reviewed, 770-772.
- W***ar of Succession in Spain 1700-1715, The*, by Henry Kamen, reviewed, 580-581.
- Weber, Francis J., *The United States versus Mexico: The Final Settlement of the Pious Fund*, foreword by Earl Warren, noticed, 434.
- Webster, Michael, notice by, 213-214.
- Weinstein, Allen, and Frank Otto Gattell, *American Negro Slavery, A Modern Reader*, noticed, 424.
- Weiss, Anita, *Tendencias de la participación electoral en Colombia*, reviewed, 181-183.
- West, Robert C., review by, 137-139.
- Westward to Vinland: The Discovery of Pre-Columbian Norse House-sites in North America*, by Helge Ingstad, noticed, 427-428.
- Whetten, Nathan L., review by, 165-167.
- Whitaker, Arthur P., review by, 774-776.
- Who's Who in Mexican Government*, edited by Marvin Alisky, noticed, 838.
- Wiarda, Howard J., *Dictatorship and Development: The Methods of Control in Trujillo's Dominican Republic*, reviewed, 386-388; *The Dominican Republic: Nation in Transition*, reviewed, 180-181.
- "Wilfrid Hardy Calcott (1895-1969)," obituary of, by C. Alan Hutchinson, 349-350.
- Wilkie, James W., *The Bolivian Revolution and U. S. Aid Since 1952*, reviewed, 806-807; and Albert L. Michaels (eds.), *Insurgent Mexico*, by John Reed, noticed, 638; and Edna Monzón de Wilkie, *México visto en el siglo XX. Entrevistas de historia oral*, noticed, 837; and Albert L. Michaels (eds.), *Revolution in Mexico: Years of Upheaval, 1910-1940*, noticed, 433-434.
- William Hickling Prescott. A Biography*, by C. Harvey Gardiner, introduction by Allan Nevins, reviewed, 753-755.
- Wilson, Edward M., and F. J. Norton (eds.), *Two Spanish Verse Chap-Books. Romance de Amadís (c. 1515-19). Juwizio Hallado y Trobado (c. 1510). A Facsimile Edition with Bibliographical and Textual Studies*, noticed, 215.
- Winn, Peter E., review by, 410-411.
- Winther, Oscar Osburn, reviews by, 364-365, 601-602.
- Wirth, John D., *The Politics of Brazilian Development, 1930-1954*, reviewed, 825-827.
- Withers, William, reviews by, 162-164, 783-784.
- Womack, John, Jr., review by, 372-374.
- Woodham, John E., "The Influence of Hipólito Unanue on Peruvian Medical Science, 1789-1830: A Reappraisal," 693-714.
- Woodward, Ralph Lee, *Robinson Crusoe's Island. A History of the Juan Fernández Islands*, reviewed, 147-148.
- World History of the Jewish People, The*. Second Series: *Medieval Period*. Vol. II: *The Dark Ages. Jews in Christian Europe, 711-1096*, edited by Cecil Roth, reviewed, 575-576.
- Worrall, Janet, review by, 610-611.

- Y**glesias, José, *In the Fist of the Revolution. Life in a Cuban Country Town*, reviewed, 382-383.
- Young, Karl E. (retold by), *Ordeal in Mexico. Tales of Danger and Hardship Collected from Mormon Colonists*, noticed, 220-221.
- Youngest Revolution, The: A Personal Report on Cuba*, by Elizabeth Sutherland, reviewed, 382-383.
- Z**ambrano, Francisco, *Diccionario bibliográfico de la Compañía de Jesús en México*. Vols. VII-IX; *Siglo XVII (1600-1699)*, noticed, 216-217.
- Zañartú, Mario, S.J., and John J. Kennedy (eds.), *The Overall Development of Chile*, reviewed, 807-809.
- Zapata: *The Ideology of a Peasant Revolutionary*, by Robert P. Millon, reviewed, 157-159.
- Zea, Leopoldo, *Latin America and the World*, introduction by María del Carmen Millán, reviewed, 116-117.
- Zegers, A., *Cristián, Aníbal Pinto: Historia política de su gobierno*, reviewed, 809-811.
- Zimmerman, Irene, review by, 168-169.
- Zinacantan: *A Maya Community in the Highlands of Chiapas*, by Evon Z. Vogt, reviewed, 604-605.
- Zondag, Cornelius H., review by, 186-187.
